# Supplementary material for: The functional consequences and prognostic value of dosage sensitivity in ovarian cancer
Source: Royal Society of Chemistry journal article supplement (doi:10.1039/c6mb00625f), 2016-12-09
Supplement: c6mb00625f1.pdf [file c6mb00625f1.pdf]

## Additional files

**Additional file 1: Table S1.** DSGs and DRGs collected by different DSS threshold values. (.xlsx); **Table S2.** 1,170 DSGs and 1,215 DRGs collected by DSS. (.xlsx)

**Additional file 2: FigureS1~S12.** Fig. S1: Functional annotation for DSGs and DRGs selected by different DSS parameters; Fig. S2: The visualization of DSGs (A) and DRGs (B) in a genome-wide karyotype plot; Fig. S3: The miRNA-TF co-regulatory networks for DSGs (A) and DRGs (B); Fig. S4: The structural features of two networks; Fig. S5: miRNA and TF in two regulatory networks; Fig. S6: Hub genes in the two networks; Fig. S7: The interaction status of the hub genes in the dosage sensitive network (A) and the resistant network (B); Fig. S8: Regulatory relationships of MYC in the two networks; Fig. S9: The significance of survival analysis of hub motif between the training set and the test set; Fig. S10: Survival-related hub motifs; Fig. S11: The significant performance of hub motif miR-98-5p-HOXA5-TP53 in survival analysis based on all OV patients; Fig. S12: Compared DSS of different datasets. **Table S3~S4.** Table S3: Summary of differential expressed miRNA and TF mediated dosage sensitive network; Table S4: Summary of differential expressed miRNA and TF mediated dosage resistant network. (.docx)
