# Supplementary material for: The functional consequences and prognostic value of dosage sensitivity in ovarian cancer
Source: Royal Society of Chemistry journal article supplement (doi:10.1039/c6mb00625f), 2016-12-09
Supplement: c6mb00625f2.xlsx [file c6mb00625f2.xlsx]

## Sheet: Table S1
Table S1 DSGs and DRGs collected by different DSS threshold values
DSS[-0.05,0.25](1,474)		DSS[0,0.3](1,628)		DSS[0.75,1.05](896)		DSS[0.8,1.1](653)
dosage resistant genes	DSS	dosage resistant genes	DSS	dosage sensitive genes	DSS	dosage sensitive genes	DSS
A4GALT	0.159977	A4GALT	0.159977	AARS	0.84949	AARS	0.84949
ABAT	0.215684	ABAT	0.215684	ABL1	0.818061	ABL1	0.818061
ABCA5	0.367189	ABCA1	0.573147	ACADVL	1.03541	ACADVL	1.03541
ABCD4	0.249439	ABCA5	0.367189	ACD	0.984426	ACD	0.984426
ABCG1	0.118745	ABCD4	0.249439	ACP1	1.02186	ACP1	1.02186
ABHD3	0.110115	ABCG1	0.118745	ACSL1	0.940635	ACSL1	0.940635
ABLIM1	0.568841	ABHD3	0.110115	ACTN1	0.975131	ACTN1	0.975131
ABTB2	0.0190594	ABLIM1	0.568841	ADAT1	0.971135	ADAT1	0.971135
ACADS	0.187365	ABTB2	0.0190594	ADD3	0.753008	AGA	0.900088
ACBD3	0.321592	ACAD10	0.291433	ADH5	0.897499	AGPAT5	0.911113
ACBD4	-0.0345701	ACADS	0.187365	AES	0.873937	AKT1	0.813397
ACOX1	0.355817	ACBD3	0.321592	AFG3L2	0.763245	ALG9	0.837019
ACP5	0.275301	ACOT7	0.270598	AGA	0.900088	ANAPC10	1.18595
ACSL5	0.301859	ACOX1	0.355817	AGPAT2	0.767029	ANKMY2	0.962959
ACTA2	0.116911	ACP5	0.275301	AGPAT5	0.911113	APPBP1	0.930708
ACTG1	0.136332	ACP6	0.393952	AGPAT7	0.771496	APTX	0.837137
ACVR1B	0.232891	ACSL5	0.301859	AHDC1	0.784366	ARFGAP3	1.00318
ADAM28	0.226727	ACTB	0.283479	AK1	0.917936	ARFIP2	0.986153
ADAMTS1	0.364867	ACTG1	0.136332	AKT1	0.813397	ARID5B	0.975317
ADAMTS13	-0.0314901	ACTR3	0.433135	ALDH6A1	0.788683	ARL2	0.85965
ADAR	0.292475	ACVR1	0.292269	ALG9	0.837019	ARPC5L	0.856511
ADCY7	0.448657	ACVR1B	0.232891	AMT	0.784989	ASCC2	0.851605
ADRA2C	0.276425	ACVR2B	0.370938	AMZ2	0.772299	ASCC3	0.971973
ADRBK1	0.13894	ADAM28	0.226727	ANAPC10	1.18595	ASCIZ	1.03389
AEBP1	0.0883709	ADAMTS1	0.364867	ANAPC5	0.76092	ATF4	0.854564
AFF1	0.199167	ADAMTS13	-0.0314901	ANKMY2	0.962959	ATP6V1B2	0.835889
AGTRL1	-0.010475	ADAR	0.292475	ANKRD11	0.797902	ATP6V1D	0.895841
AHCYL1	0.381071	ADCY6	0.313609	ANKRD15	0.783592	ATP6V1E1	0.966313
AIM1	0.608474	ADCY7	0.448657	APPBP1	0.930708	ATPBD1C	0.856426
AIM1L	0.0607128	ADCY9	0.256461	APTX	0.837137	BACE2	0.815619
AKAP12	0.0169119	ADFP	0.293361	AQP3	0.900962	BAZ2B	0.944282
ALDH1A3	0.226438	ADM	0.348896	ARFGAP3	1.00318	BCAT2	0.898279
ALDH3A1	0.0981891	ADRA2C	0.276425	ARFIP2	0.986153	BCL2L13	0.808822
ALDH3B1	0.00711331	ADRBK1	0.13894	ARHGAP17	0.783216	BCR	0.913879
ALDH4A1	0.20879	AEBP1	0.0883709	ARHGAP5	0.755064	BDH2	1.05148
ALDOC	0.165982	AFF1	0.199167	ARID5B	0.975317	BHLHB2	0.835683
ALOX5AP	-0.0577417	AHCYL1	0.381071	ARL2	0.85965	BIN3	0.808489
AMDHD2	0.210337	AIM1	0.608474	ARPC5L	0.856511	BMPR1A	1.005
AMIGO2	0.164915	AIM1L	0.0607128	ARPP-19	0.791375	BNIP3	0.872101
AMPD3	0.177741	AKAP8L	0.30171	ASCC2	0.851605	BNIP3L	0.804764
ANAPC13	0.340753	AKR1A1	0.490909	ASCC3	0.971973	BRD3	1.0396
ANG	0.146965	ALDH1A3	0.226438	ASCIZ	1.03389	BRD7	1.08192
ANGPTL2	0.176033	ALDH3A1	0.0981891	ATF4	0.854564	BSCL2	0.835674
ANKRD6	0.393483	ALDH4A1	0.20879	ATG5	0.798952	BSG	1.08154
ANP32E	0.163957	ALDH9A1	0.376706	ATP5D	0.796384	BSPRY	0.979881
ANXA4	0.55107	ALDOC	0.165982	ATP6V1B2	0.835889	BTAF1	0.954725
ANXA6	-0.00975058	AMDHD2	0.210337	ATP6V1D	0.895841	C11orf58	0.810479
AP3B1	0.450765	AMIGO2	0.164915	ATP6V1E1	0.966313	C12orf10	0.917046
APBA2	0.412483	AMPD3	0.177741	ATPBD1C	0.856426	C12orf41	0.828431
APBB1	0.158655	ANAPC13	0.340753	AURKB	0.796873	C12orf43	0.845875
APH1A	0.236172	ANG	0.146965	AUTS2	0.870238	C12orf44	0.927248
APH1B	-0.0499451	ANKRD6	0.393483	BACE2	0.815619	C15orf15	1.00914
APIP	0.467211	ANP32E	0.163957	BAZ2B	0.944282	C15orf44	0.890264
APOA1	0.472278	ANXA2	0.474573	BCAT2	0.898279	C16orf24	0.816938
APOBEC3B	-0.147249	ANXA4	0.55107	BCL2L13	0.808822	C16orf61	0.860791
APOBEC3C	0.0415836	AP1S1	0.297207	BCR	0.913879	C16orf80	1.03403
APOC1	-0.0533802	AP3B1	0.450765	BHLHB2	0.835683	C17orf48	0.838117
APOE	0.19729	APBA2	0.412483	BIN3	0.808489	C17orf81	0.971431
APOLD1	0.249773	APBB1	0.158655	BLM	0.751422	C17orf85	0.810572
APOM	0.147356	APC	0.28864	BMPR1A	1.005	C18orf10	0.999062
APP	0.166655	APH1A	0.236172	BMPR2	0.867965	C19orf10	0.991852
APRT	0.651245	APIP	0.467211	BNIP3	0.872101	C19orf22	1.00764
AQP1	0.0041567	APOA1	0.472278	BNIP3L	0.804764	C1orf38	0.889371
ARF1	0.344629	APOBEC3C	0.0415836	BRD3	1.0396	C1orf63	0.862386
ARFGEF2	0.230732	APOE	0.19729	BSCL2	0.835674	C1QBP	0.834127
ARHGAP1	0.219096	APOLD1	0.249773	BSPRY	0.979881	C21orf25	0.962699
ARHGAP10	0.0566531	APOM	0.147356	BTAF1	0.954725	C21orf59	0.807483
ARHGAP25	0.124959	APP	0.166655	BTG1	0.792069	C21orf91	0.969836
ARHGEF1	0.1897	APRT	0.651245	BYSL	0.752807	C22orf9	0.80189
ARHGEF10L	0.211252	ARF1	0.344629	BZW2	0.762218	C3orf14	0.817033
ARHGEF11	0.122031	ARFGEF2	0.230732	C10orf26	0.769318	C3orf60	0.879564
ARHGEF16	0.217529	ARFRP1	0.2547	C11orf48	0.785904	C4orf15	0.815163
ARHGEF2	0.182566	ARHGAP1	0.219096	C11orf57	0.770319	C4orf16	1.03135
ARID1A	0.366228	ARHGAP12	0.487419	C11orf58	0.810479	C4orf20	1.02539
ARID3B	0.217281	ARHGAP25	0.124959	C12orf10	0.917046	C4orf27	0.924917
ARID5A	0.0964895	ARHGAP26	0.396628	C12orf41	0.828431	C5orf21	0.955812
ARMC6	0.238704	ARHGEF1	0.1897	C12orf43	0.845875	C5orf30	0.802724
ARMC7	0.0806934	ARHGEF10L	0.211252	C12orf44	0.927248	C5orf5	0.801159
ARNT	0.172446	ARHGEF11	0.122031	C14orf159	0.770573	C6orf66	0.907796
ARNTL	0.2655	ARHGEF16	0.217529	C15orf15	1.00914	C9orf16	0.808171
ARPC5	0.193477	ARID1A	0.366228	C15orf44	0.890264	C9orf46	0.872778
ARS2	0.0548802	ARID3B	0.217281	C16orf24	0.816938	C9orf82	0.807539
ARVCF	0.208801	ARMC6	0.238704	C16orf53	0.761943	CACNB3	0.813676
ASH1L	0.184056	ARNT	0.172446	C16orf61	0.860791	CALML4	0.906938
ASPH	0.176864	ARNTL	0.2655	C16orf80	1.03403	CAMLG	0.835838
ASPHD1	0.0453632	ARPC5	0.193477	C17orf48	0.838117	CAND1	0.819179
ATAD3A	0.287112	ARS2	0.0548802	C17orf81	0.971431	CARS	0.97162
ATAD4	0.411078	ARVCF	0.208801	C17orf85	0.810572	CASP6	0.960973
ATF7IP2	0.367296	ASAHL	0.299265	C18orf10	0.999062	CASP8AP2	0.92159
ATOX1	0.437996	ASH1L	0.184056	C19orf10	0.991852	CAV1	1.05495
ATP10A	0.28214	ASPH	0.176864	C19orf22	1.00764	CBX7	1.00146
ATP11B	0.302445	ATAD3A	0.287112	C19orf28	0.7954	CCDC28A	0.877185
ATP13A2	0.208062	ATAD4	0.411078	C1orf38	0.889371	CCDC56	0.853679
ATP1B1	0.323219	ATF3	0.476195	C1orf41	0.783009	CCDC6	0.921826
ATP5B	0.470032	ATF6	0.34213	C1orf63	0.862386	CCNB2	0.871587
ATP5G3	0.28337	ATF7IP	0.25213	C1QBP	0.834127	CCNC	1.06591
ATP5H	0.29025	ATF7IP2	0.367296	C21orf25	0.962699	CCNH	0.892404
ATP6V0A1	0.229157	ATOX1	0.437996	C21orf59	0.807483	CCT2	0.901107
ATP6V0D1	0.650979	ATP10A	0.28214	C21orf91	0.969836	CD164	0.81546
ATP6V1B1	0.0365113	ATP11B	0.302445	C22orf9	0.80189	CDC2L2	0.8149
ATP8B1	0.0594231	ATP13A2	0.208062	C2orf33	0.790151	CDC34	1.05574
ATP8B2	0.0743249	ATP1B1	0.323219	C3orf14	0.817033	CDC40	0.821114
AVPI1	0.430805	ATP2B4	0.42773	C3orf60	0.879564	CDCP1	1.17268
AZI1	0.223596	ATP5B	0.470032	C4orf15	0.815163	CDK4	0.818255
B2M	0.166913	ATP5E	0.269329	C4orf16	1.03135	CDK5RAP2	0.80919
B3GAT3	0.323691	ATP5G3	0.28337	C4orf20	1.02539	CDK7	1.02828
B3GNT2	0.26778	ATP5H	0.29025	C4orf27	0.924917	CDKN1C	0.826087
B4GALT2	0.199001	ATP6V0A1	0.229157	C5orf21	0.955812	CDKN2AIP	0.899089
BACH1	0.222411	ATP6V0D1	0.650979	C5orf30	0.802724	CENTG2	0.961727
BAD	0.527486	ATP6V1B1	0.0365113	C5orf5	0.801159	CES2	0.856218
BAIAP2	0.2185	ATP8B2	0.0743249	C6orf66	0.907796	CETN3	0.938005
BAK1	0.147015	AVPI1	0.430805	C9orf16	0.808171	CFDP1	0.91166
BASP1	0.0152233	AXL	0.276328	C9orf46	0.872778	CHD1	1.00958
BBC3	0.0758982	AZI1	0.223596	C9orf6	0.755791	CHMP1B	0.842126
BBS5	0.100132	B3GAT3	0.323691	C9orf82	0.807539	CHORDC1	0.811702
BCAP29	0.133478	B3GNT2	0.26778	CACNB3	0.813676	CHUK	0.849993
BCCIP	0.275522	B4GALT2	0.199001	CALML4	0.906938	CIAPIN1	1.02861
BCL10	0.39725	BACH1	0.222411	CAMLG	0.835838	CIB1	0.967681
BCL2L1	0.181932	BAD	0.527486	CAND1	0.819179	CINP	0.903325
BCL2L10	0.00912855	BAIAP2	0.2185	CAPN1	0.787794	CKAP4	0.918917
BCL2L2	0.274007	BAK1	0.147015	CARS	0.97162	CKLF	0.82101
BCL3	0.0630933	BAT1	0.329225	CASC3	0.79006	CLASP2	0.809948
BCL6	-0.00858071	BBC3	0.0758982	CASP6	0.960973	CLCN3	1.05329
BECN1	0.47386	BBS5	0.100132	CASP8AP2	0.92159	CLINT1	0.848003
BET1L	0.161821	BCAP29	0.133478	CAST	0.789569	CLP1	0.83924
BGLAP	0.174981	BCCIP	0.275522	CAV1	1.05495	CLPP	0.831061
BICD1	0.246737	BCL10	0.39725	CBFB	0.760185	CLPX	0.881098
BIRC3	0.301135	BCL2L1	0.181932	CBX7	1.00146	CNN2	0.929233
BLVRA	0.188325	BCL2L10	0.00912855	CCDC25	0.795371	CNOT7	0.878292
BMP1	0.241961	BCL2L2	0.274007	CCDC28A	0.877185	COG5	0.846285
BMP7	0.128906	BCL3	0.0630933	CCDC44	0.774885	COG7	0.888823
BNC2	0.186734	BECN1	0.47386	CCDC56	0.853679	COL9A2	0.87536
BRMS1	0.364952	BET1L	0.161821	CCDC6	0.921826	COMMD4	0.912819
BST2	0.142618	BICD1	0.246737	CCNA2	0.763643	COMMD8	0.948806
BTG2	0.265998	BIN1	0.495693	CCNB2	0.871587	COPS2	0.93527
BTN2A2	0.230965	BIRC3	0.301135	CCNG1	0.760284	COPS4	1.05284
BUB1	0.208249	BLVRA	0.188325	CCNH	0.892404	COPS8	0.854972
C10orf10	0.25903	BLZF1	0.274807	CCT2	0.901107	COQ3	0.889657
C10orf110	-0.0166563	BMP1	0.241961	CD164	0.81546	COQ9	1.02558
C10orf116	-0.0264242	BNC2	0.186734	CDC2L2	0.8149	CORO2A	0.985322
C11orf17	0.275319	BRMS1	0.364952	CDC40	0.821114	COX15	0.8376
C11orf24	0.158409	BST2	0.142618	CDCP1	1.17268	CP110	0.889398
C14orf143	0.17512	BTG2	0.265998	CDH2	0.762925	CRAT	0.843817
C14orf166	0.554274	BTN2A2	0.230965	CDH3	0.791375	CRELD2	1.09284
C14orf172	0.230119	BTN3A3	0.361122	CDK4	0.818255	CRTC3	0.9556
C14orf94	0.247698	BUD31	0.334891	CDK5RAP2	0.80919	CRYAB	0.940713
C16orf42	0.242641	BZRAP1	0.263904	CDK7	1.02828	CRYZ	0.9857
C16orf45	0.343668	C10orf10	0.25903	CDKN1C	0.826087	CSK	0.845459
C19orf50	0.200314	C11orf17	0.275319	CDKN2AIP	0.899089	CSNK1G3	0.858411
C1D	0.455549	C13orf1	0.281994	CENPE	0.784842	CST6	0.996971
C1orf103	0.288556	C14orf143	0.17512	CENTG2	0.961727	CTPS	0.805333
C1orf106	0.59615	C14orf166	0.554274	CEP192	0.756248	CTR9	1.04982
C1orf109	0.487589	C14orf172	0.230119	CEP76	0.764743	CUL4A	0.814559
C1orf113	0.0641389	C14orf94	0.247698	CES2	0.856218	CXCL10	0.968924
C1orf115	0.229707	C16orf42	0.242641	CETN3	0.938005	CXXC1	0.883972
C1orf144	0.390122	C16orf45	0.343668	CFDP1	0.91166	CYB5A	0.935505
C1orf159	0.240922	C19orf50	0.200314	CGRRF1	0.766065	CYB5R3	0.860177
C1orf160	0.484987	C1D	0.455549	CHD1	1.00958	CYFIP1	0.960908
C1orf165	0.291808	C1orf103	0.288556	CHD9	0.775247	D4S234E	1.01036
C1orf166	0.236557	C1orf106	0.59615	CHMP1B	0.842126	DALRD3	0.90731
C1orf183	0.0503231	C1orf109	0.487589	CHMP5	0.792738	DAZAP2	0.825442
C1orf27	0.498022	C1orf113	0.0641389	CHMP7	0.784552	DCI	0.900849
C1orf54	0.140707	C1orf115	0.229707	CHORDC1	0.811702	DCTD	0.850289
C1orf66	0.0832267	C1orf135	0.331899	CHUK	0.849993	DCTN5	0.872503
C1orf77	0.208099	C1orf144	0.390122	CIAPIN1	1.02861	DCTN6	0.940264
C1orf78	0.330697	C1orf159	0.240922	CIB1	0.967681	DDX10	0.805429
C1QTNF1	0.0576103	C1orf160	0.484987	CINP	0.903325	DDX21	0.894153
C1QTNF3	0.0169638	C1orf165	0.291808	CKAP4	0.918917	DDX50	0.887626
C1S	0.00597104	C1orf166	0.236557	CKLF	0.82101	DDX58	1.26848
C2	0.204754	C1orf27	0.498022	CLASP2	0.809948	DEAF1	0.958945
C20orf103	-0.00159661	C1orf35	0.271016	CLINT1	0.848003	DENND1A	1.04245
C20orf111	0.279024	C1orf54	0.140707	CLK3	0.757413	DENR	0.884695
C20orf117	0.25371	C1orf66	0.0832267	CLP1	0.83924	DERL2	0.84106
C20orf121	0.230115	C1orf77	0.208099	CLPP	0.831061	DET1	0.855393
C20orf149	0.145033	C1orf78	0.330697	CLPX	0.881098	DFFA	0.804748
C20orf24	0.247018	C1QTNF1	0.0576103	CNN2	0.929233	DHX40	0.805793
C20orf59	0.0704746	C1QTNF3	0.0169638	CNOT7	0.878292	DIABLO	0.824215
C20orf67	0.232686	C1S	0.00597104	COG5	0.846285	DLAT	0.96292
C2orf18	0.218613	C20orf103	-0.00159661	COG7	0.888823	DLG5	0.930147
C2orf25	0.46518	C20orf111	0.279024	COIL	0.794829	DMXL1	0.929157
C2orf27	-0.0423895	C20orf117	0.25371	COL9A2	0.87536	DNAJA2	1.07646
C2orf47	0.379222	C20orf121	0.230115	COMMD4	0.912819	DNAL4	0.906861
C3	-0.204835	C20orf149	0.145033	COMMD8	0.948806	DOCK1	0.8145
C3orf28	0.248785	C20orf24	0.247018	COPS2	0.93527	DONSON	0.97482
C5AR1	0.0719405	C20orf59	0.0704746	COPS3	0.774889	DPM2	0.96538
C5orf13	-0.0607922	C20orf67	0.232686	COPS8	0.854972	DPP8	0.902726
C5orf23	0.359928	C2orf18	0.218613	COQ3	0.889657	DPYSL2	0.888919
C7	0.0432674	C2orf34	0.322761	COQ9	1.02558	DRAP1	0.824852
C7orf28A	0.140365	C2orf47	0.379222	CORO2A	0.985322	DVL2	0.953138
C7orf42	0.33291	C3orf28	0.248785	COX15	0.8376	DYNC1LI1	0.816144
C7orf43	0.163743	C5orf23	0.359928	COX4I1	0.764175	E2F6	0.882935
C8orf4	0.000463203	C7	0.0432674	CP110	0.889398	ECD	0.969299
C9orf156	0.237406	C7orf24	0.341616	CRAT	0.843817	EFHA1	0.873781
C9orf7	0.414276	C7orf28A	0.140365	CRNKL1	0.783035	EFNB2	0.983625
CA11	0.0865673	C7orf42	0.33291	CRTC3	0.9556	EIF2B1	1.08278
CA9	0.32662	C7orf43	0.163743	CRYAB	0.940713	EIF4E	0.94997
CACNA2D1	0.0127108	C9orf156	0.237406	CRYZ	0.9857	ELP3	0.871774
CACNG1	0.0634202	C9orf7	0.414276	CSK	0.845459	ENOSF1	0.887345
CACNG4	0.190291	C9orf9	0.321779	CSNK1G3	0.858411	EPHX2	1.03351
CADPS2	-0.0799096	CA11	0.0865673	CST6	0.996971	ERBB4	0.913741
CALM2	0.223074	CA9	0.32662	CTBP2	0.787973	ERP29	0.886544
CALR	0.167781	CACNA2D1	0.0127108	CTNND1	0.765447	ESPL1	0.945922
CAMK1	0.254218	CACNG4	0.190291	CTPS	0.805333	ETFA	0.932979
CAMK2N1	0.13505	CALM2	0.223074	CTR9	1.04982	EXOC1	0.945614
CANT1	0.395872	CALR	0.167781	CUL4A	0.814559	EXOSC7	0.928494
CARD10	0.191673	CAMK1	0.254218	CUTC	0.762985	EXPH5	0.827492
CARD8	0.153951	CAMK2N1	0.13505	CXCL10	0.968924	FAM107A	1.04979
CARD9	0.0588335	CANT1	0.395872	CXXC1	0.883972	FAM26B	0.821141
CASKIN2	0.138663	CAPN2	0.273936	CYB5A	0.935505	FANCF	0.95295
CASP1	0.428974	CARD10	0.191673	CYB5R2	0.892412	FAT	1.09565
CASP7	0.386859	CARD8	0.153951	CYB5R3	0.860177	FBXL4	0.80978
CASZ1	0.0849691	CARD9	0.0588335	CYFIP1	0.960908	FBXL5	0.92343
CBLB	0.20845	CASKIN2	0.138663	D4S234E	1.01036	FBXO21	0.87721
CBX1	0.458906	CASP1	0.428974	DAAM1	0.798457	FBXO3	0.83757
CC2D1A	0.283443	CASP7	0.386859	DALRD3	0.90731	FBXO5	0.82809
CCBL1	0.238477	CASZ1	0.0849691	DAZAP2	0.825442	FCMD	0.852721
CCDC121	0.229281	CBLB	0.20845	DCI	0.900849	FER1L3	0.822328
CCDC21	0.19765	CBX1	0.458906	DCP1A	0.7713	FIBP	0.919779
CCDC49	0.247922	CC2D1A	0.283443	DCTD	0.850289	FKBP2	0.949655
CCL22	0.0265468	CCBL1	0.238477	DCTN5	0.872503	FKBP3	0.831834
CCNA1	-0.011249	CCDC121	0.229281	DCTN6	0.940264	FLJ10769	0.832074
CCNB1	0.708613	CCDC21	0.19765	DDHD2	0.771482	FLJ20035	1.05754
CCNB1IP1	0.236015	CCDC49	0.247922	DDX1	0.764377	FLJ22167	0.809514
CCNF	0.176281	CCL22	0.0265468	DDX10	0.805429	FLNB	1.05577
CCNT2	0.211629	CCNB1	0.708613	DDX19A	0.793889	FRAG1	0.847212
CCR1	0.185822	CCNB1IP1	0.236015	DDX21	0.894153	FTH1	0.991105
CCR5	0.0976409	CCNF	0.176281	DDX23	0.794907	FUT8	1.03904
CCT3	0.308857	CCNG2	0.606069	DDX50	0.887626	GADD45A	0.80492
CCT6B	0.184685	CCNT2	0.211629	DDX58	1.26848	GAPVD1	1.00825
CD14	0.0573149	CCR1	0.185822	DEAF1	0.958945	GARNL4	0.818605
CD2	0.13552	CCR5	0.0976409	DENND1A	1.04245	GLT8D1	0.839971
CD200	0.210976	CCT3	0.308857	DENND2D	0.773499	GLTP	0.850904
CD302	0.0471121	CCT6B	0.184685	DENR	0.884695	GMFB	0.80173
CD34	0.0123729	CCT8	0.278635	DERL2	0.84106	GORASP1	0.87759
CD3D	-0.119192	CD14	0.0573149	DET1	0.855393	GOT2	0.986091
CD4	-0.0942601	CD2	0.13552	DFFA	0.804748	GRAMD3	0.875484
CD40	0.125521	CD200	0.210976	DHFR	0.750565	GRHPR	0.886327
CD46	0.296349	CD34	0.0123729	DHX29	0.758989	GTF2A2	0.946596
CD52	0.050667	CD40	0.125521	DHX30	0.757033	GTF2E2	0.956793
CD55	0.196654	CD46	0.296349	DHX40	0.805793	GUCY1B3	1.3851
CD70	-0.0461555	CD55	0.196654	DIABLO	0.824215	H2AFY2	0.808985
CD82	0.0649012	CD83	0.295891	DLAT	0.96292	HARS	0.837546
CD9	0.200213	CD9	0.200213	DLG5	0.930147	HCFC1R1	1.04334
CD93	-0.160029	CD97	0.278088	DMXL1	0.929157	HDAC2	0.939983
CDC16	0.542909	CDC16	0.542909	DNAL4	0.906861	HDAC9	0.888921
CDC25A	0.235701	CDC25A	0.235701	DNMT3A	0.758512	HDGFRP3	0.9283
CDC27	0.308653	CDC27	0.308653	DOCK1	0.8145	HEATR2	1.08103
CDC2L5	0.130785	CDC2L5	0.130785	DONSON	0.97482	HERC1	0.938229
CDC42	0.249154	CDC42	0.249154	DPM2	0.96538	HERPUD1	1.0734
CDC42EP2	0.154559	CDC42EP1	0.299604	DPP8	0.902726	HIP2	0.982528
CDH22	0.0559533	CDC42EP2	0.154559	DPYSL2	0.888919	HISPPD1	1.03796
CDH6	0.190791	CDH22	0.0559533	DRAP1	0.824852	HOXC4	0.910205
CDK3	0.118102	CDH6	0.190791	DSCR2	0.791285	HPS5	0.841993
CDKN2C	0.125693	CDR2L	0.397845	DVL2	0.953138	HRH1	0.896593
CDR2L	0.397845	CDS2	0.39648	DYNC1LI1	0.816144	HSBP1	0.86591
CDS2	0.39648	CDX1	0.0766945	E2F6	0.882935	HSD17B11	0.869991
CDX1	0.0766945	CEBPB	0.208702	ECD	0.969299	HSPA12A	0.944893
CEBPB	0.208702	CEBPD	0.10983	EFHA1	0.873781	HSPA9	0.913254
CEBPD	0.10983	CENTA1	0.338575	EFNB2	0.983625	HSPC111	0.881275
CENTA2	0.247487	CENTA2	0.247487	EFTUD1	0.794954	HSPC159	0.894813
CFB	0.0741433	CFB	0.0741433	EIF2AK1	0.752683	HSPC171	0.828697
CFD	0.262218	CFD	0.262218	EIF4E	0.94997	HTRA1	0.890973
CFH	0.106283	CFH	0.106283	ELMO3	0.767574	HYPK	1.04804
CHAF1A	0.336287	CHAC1	0.299039	ELP3	0.871774	IARS	0.908993
CHD3	0.303006	CHAF1A	0.336287	EMID1	0.750991	IDH2	1.08003
CHD4	0.24399	CHD1L	0.270633	ENOSF1	0.887345	IGF2R	0.893472
CHEK1	0.345605	CHD3	0.303006	EP400	0.792427	IGFBP2	1.02848
CHI3L1	0.264065	CHD4	0.24399	EPB41L4B	1.28886	IL2RB	0.804934
CHMP2B	0.393382	CHEK1	0.345605	EPHX2	1.03351	IMP3	1.04139
CHST1	0.448878	CHERP	0.278521	EPM2AIP1	0.75894	IMPA2	1.04259
CHST2	0.18123	CHI3L1	0.264065	ERBB4	0.913741	IMPDH2	0.92212
CHST5	-0.00586266	CHMP2B	0.393382	ERP29	0.886544	INTS12	1.03674
CIDEC	0.120306	CHMP4A	0.451484	ESPL1	0.945922	IQCK	0.944091
CILP	0.212594	CHMP6	0.31796	ETFA	0.932979	IQGAP1	0.837868
CISH	0.212485	CHST1	0.448878	EXOC1	0.945614	IRS1	1.07586
CLCN2	0.164735	CHST2	0.18123	EXOSC7	0.928494	IRS2	0.823138
CLCN7	0.284343	CIB2	0.285199	EXOSC9	0.779187	ISOC1	1.03277
CLDN1	0.194911	CIDEC	0.120306	EXPH5	0.827492	ISOC2	0.804264
CLDN16	0.355625	CISH	0.212485	FAF1	0.757839	ITGB8	0.808165
CLDN5	0.0765524	CLCN2	0.164735	FAM107A	1.04979	JRKL	0.86971
CLDND1	0.372434	CLCN7	0.284343	FAM13A1	0.865804	KARS	0.930913
CLEC11A	0.0393003	CLDN1	0.194911	FAM26B	0.821141	KATNB1	0.833426
CLIC4	0.287292	CLDN15	0.344018	FAM62A	0.775985	KIAA0174	0.922701
CLIC5	0.15108	CLDN16	0.355625	FAM89B	0.883874	KIAA0317	0.828629
CLTA	0.530125	CLDND1	0.372434	FANCF	0.95295	KIAA0372	1.02945
CLU	0.501185	CLEC11A	0.0393003	FAT	1.09565	KIAA0746	1.00828
CNIH4	0.329775	CLIC4	0.287292	FBXL4	0.80978	KIAA0776	1.04791
CNN1	0.175268	CLIC5	0.15108	FBXL5	0.92343	KIAA0831	0.943046
CNNM2	0.2833	CLPTM1	0.286267	FBXO21	0.87721	KIAA1279	0.874265
CNNM4	0.169443	CLTA	0.530125	FBXO3	0.83757	KIF1B	0.913745
CNOT4	0.211069	CLU	0.501185	FBXO5	0.82809	KIF23	0.847214
CNTNAP1	0.215436	CNBP	0.267675	FCMD	0.852721	KIF2A	0.849424
COASY	0.382864	CNIH4	0.329775	FDX1	0.896916	KLHL2	0.923174
COL15A1	0.12798	CNN1	0.175268	FECH	0.762345	KLHL23	0.902219
COL16A1	0.264157	CNNM2	0.2833	FER1L3	0.822328	KPNA3	0.824223
COL1A1	-0.0237125	CNNM3	0.298862	FHIT	0.750962	KRT18	0.821012
COL4A1	0.201545	CNNM4	0.169443	FIBP	0.919779	KRT8	0.83767
COL6A1	-0.00858055	CNOT4	0.211069	FIP1L1	0.788826	LARS	0.864984
COL8A2	0.102823	CNTNAP1	0.215436	FKBP2	0.949655	LARS2	0.939794
COLEC12	0.0864186	COASY	0.382864	FKBP3	0.831834	LCMT2	0.852673
COPG	0.526237	COL15A1	0.12798	FLJ10769	0.832074	LEPROTL1	0.928642
COPZ2	0.0938628	COL16A1	0.264157	FLJ11184	0.796585	LGR4	0.911026
COTL1	0.0113691	COL4A1	0.201545	FLJ12716	0.789662	LIMK2	0.83808
COX5B	0.239971	COL8A2	0.102823	FLJ20035	1.05754	LOC400506	1.02614
COX6A1	0.399371	COLEC12	0.0864186	FLJ22167	0.809514	LOC57228	1.09236
COX6A2	0.0725304	COPG	0.526237	FRAG1	0.847212	LPXN	0.81788
COX7A1	0.0435617	COX5B	0.239971	FRAT2	0.754629	LRRC59	0.836178
CP	-0.13875	COX6A1	0.399371	FTH1	0.991105	LSM6	1.05872
CPNE7	0.0290136	COX6A2	0.0725304	FUT8	1.03904	LSM7	1.05527
CPVL	0.687725	COX7A1	0.0435617	FVT1	0.752782	LTA4H	0.953965
CRABP2	0.0717021	CPNE7	0.0290136	FYCO1	0.89278	LYRM2	0.986851
CRADD	0.170234	CPSF6	0.33595	FZD10	0.764184	LZTFL1	0.803319
CREBBP	0.238931	CPVL	0.687725	G3BP1	0.758804	M-RIP	0.817962
CRIP1	-0.0627107	CRABP2	0.0717021	GADD45A	0.80492	MAD2L1	1.26726
CRISPLD2	0.0695637	CRADD	0.170234	GALNT3	0.900921	MAEA	0.95751
CRKRS	0.312203	CREBBP	0.238931	GAPVD1	1.00825	MAK10	0.918737
CRLF3	0.337326	CREM	0.27185	GARNL4	0.818605	MAN2B2	0.846175
CRTC1	0.0903158	CRIM1	0.357538	GCHFR	0.782747	MAPK6	0.882936
CRY2	0.286644	CRISPLD2	0.0695637	GCN1L1	0.776464	42434	0.870455
CRYL1	0.314295	CRKRS	0.312203	GDPD5	0.75113	MARCKS	0.834333
CSF1	0.155702	CRLF3	0.337326	GLT8D1	0.839971	MED6	0.839026
CSF1R	0.161645	CRTC1	0.0903158	GLTP	0.850904	METAP1	0.841174
CSPG5	0.407573	CRY2	0.286644	GMFB	0.80173	METAP2	0.855113
CSRP1	0.266701	CRYL1	0.314295	GNL3	0.750452	METTL9	0.935228
CSTA	0.340213	CSDA	0.25417	GOLGA2	0.775137	MFAP1	0.895752
CSTF3	0.0316104	CSF1	0.155702	GOLGA5	0.775701	MGMT	0.850942
CTAGE5	0.229624	CSF1R	0.161645	GORASP1	0.87759	MIS12	1.06299
CTDSPL	0.373121	CSPG5	0.407573	GOT2	0.986091	MKNK2	1.01667
CTGF	0.241448	CSRP1	0.266701	GPR56	0.758338	MLF1IP	0.807875
CTSA	0.334658	CSTA	0.340213	GPRC5B	0.791289	MMP7	0.861152
CTSB	0.301555	CTAGE5	0.229624	GPS2	0.779242	MOCS2	0.934101
CTSK	0.0141562	CTBS	0.381778	GRAMD3	0.875484	MPP5	0.803284
CTSS	-0.0124991	CTDP1	0.292826	GRHPR	0.886327	MPPE1	0.808234
CTSZ	0.117629	CTDSPL	0.373121	GRPEL1	0.773944	MRFAP1L1	0.833842
CUGBP1	0.196709	CTGF	0.241448	GTF2A2	0.946596	MRPL16	0.888168
CUGBP2	0.169562	CTSA	0.334658	GTF2B	0.791664	MRPL23	0.926425
CUTL1	0.164073	CTSK	0.0141562	GTF2E2	0.956793	MRPL39	0.837825
CXCL2	0.134692	CTSZ	0.117629	GTF2H1	0.763582	MRPL40	0.910365
CXCL9	0.149008	CUGBP1	0.196709	GTF3C1	0.79817	MRPS16	1.06605
CYB561D2	0.383662	CUGBP2	0.169562	GUCY1B3	1.3851	MRPS27	1.0248
CYB5B	0.484295	CUTL1	0.164073	H2AFY2	0.808985	MRPS31	0.864406
CYB5R4	0.516449	CWF19L1	0.335349	H2AFZ	0.794984	MSLN	1.00542
CYBA	0.288904	CXCL13	0.253945	HARS	0.837546	MTL5	0.849109
CYP27A1	0.257208	CXCL2	0.134692	HCFC1R1	1.04334	MTO1	0.91456
DAB2	0.0302344	CXCL9	0.149008	HDAC2	0.939983	MXI1	0.995888
DAP3	0.363662	CXCR4	0.629683	HDAC4	0.794006	MYH10	1.08684
DAPP1	0.157592	CYB561D2	0.383662	HDAC9	0.888921	MYL6B	0.80038
DBI	-0.108316	CYB5B	0.484295	HDGFRP3	0.9283	NANOS1	0.952733
DBR1	0.173497	CYB5R1	0.27655	HERC1	0.938229	NANS	0.895681
DBT	0.273233	CYB5R4	0.516449	HIF1A	0.757679	NAP1L4	0.88456
DCC1	0.211666	CYBA	0.288904	HIG2	0.782708	NARS	0.810176
DCN	0.173003	CYP27A1	0.257208	HIP2	0.982528	NARS2	0.877457
DDOST	0.416033	CYR61	0.536997	HISPPD1	1.03796	NAV2	0.843705
DDR2	-0.0869542	DAB2	0.0302344	HMG20A	0.777497	NCLN	0.816617
DDX31	0.270674	DAP3	0.363662	HMG2L1	0.754158	NCOR1	0.96405
DEFB1	0.49778	DAPP1	0.157592	HNRPUL1	0.753636	NDUFA7	0.837774
DHODH	0.143305	DBN1	0.342584	HOXC4	0.910205	NDUFA8	0.811673
DHRS7	0.274125	DBNDD2	0.456817	HPS5	0.841993	NDUFC1	0.808597
DHX8	0.448418	DBR1	0.173497	HRH1	0.896593	NDUFS4	0.91748
DNAJB4	0.228003	DBT	0.273233	HSBP1	0.86591	NDUFS7	1.09224
DNAJC1	0.238847	DCC1	0.211666	HSD17B11	0.869991	NGRN	0.988633
DNALI1	0.0228287	DCN	0.173003	HSPA12A	0.944893	NIP30	0.887388
DNM2	0.121335	DDOST	0.416033	HSPA9	0.913254	NISCH	0.806036
DNPEP	0.241631	DDR2	-0.0869542	HSPC111	0.881275	NKIRAS2	0.835091
DNTTIP2	0.423829	DDX31	0.270674	HSPC159	0.894813	NME3	0.835289
DOK1	0.106306	DDX46	0.34187	HSPC171	0.828697	NME5	1.01392
DOK5	-0.059454	DEDD	0.321825	HTRA1	0.890973	NMU	0.82571
DOM3Z	0.500609	DEFB1	0.49778	HYPK	1.04804	NOC3L	0.98802
DPM3	0.314407	DEGS1	0.481633	IARS	0.908993	NOL8	1.10281
DPYSL3	0.541244	DHCR24	0.585233	IFRD1	0.754134	NOSIP	0.919065
DST	0.105351	DHODH	0.143305	IFT88	0.77292	NPTN	0.818865
DSTN	0.346804	DHRS7	0.274125	IGF1R	0.756827	NSMCE4A	0.830022
DTNB	0.101232	DHX8	0.448418	IGF2R	0.893472	NSUN5	0.823515
DULLARD	0.506378	DHX9	0.295727	IGFBP2	1.02848	NTHL1	0.909006
DUSP12	0.444835	DMWD	0.256035	IL2RB	0.804934	NUDT9	1.02392
DUSP2	0.221684	DNAJA1	0.537655	ILK	0.752522	NUP37	1.04947
DYNC1I1	-0.0109128	DNAJB4	0.228003	IMP3	1.04139	NUP43	0.892554
DYNC2LI1	0.349998	DNAJB9	0.377539	IMPA2	1.04259	NUP54	0.881417
DYNLL1	0.191469	DNAJC1	0.238847	IMPACT	0.752771	NUP98	0.896054
DYSF	0.0591474	DNAJC15	0.454753	IMPDH2	0.92212	NUTF2	1.09052
E2F1	0.188911	DNM1	0.270172	INTS12	1.03674	OAZ2	0.809206
E2F4	0.252586	DNM2	0.121335	IQCK	0.944091	OBFC1	0.814315
ECE1	0.12198	DNPEP	0.241631	IQGAP1	0.837868	OSBPL10	0.836062
ECM1	0.0107084	DNTTIP2	0.423829	IRF7	0.799545	OXSM	0.804105
EDG4	0.283194	DOK1	0.106306	IRS2	0.823138	OXSR1	0.900516
EDG7	0.233605	DOM3Z	0.500609	ISOC1	1.03277	P4HA1	0.95724
EEF1A1	0.0958776	DPM3	0.314407	ISOC2	0.804264	PACSIN2	1.02543
EFEMP1	0.100071	DPYSL3	0.541244	ITGB8	0.808165	PAFAH1B3	0.86879
EFHD2	0.448492	DST	0.105351	JOSD3	0.799169	PAPOLA	0.802399
EFNA1	0.191859	DSTN	0.346804	JRKL	0.86971	PAPSS1	0.872967
EFNA3	0.35254	DTNB	0.101232	KARS	0.930913	PARN	0.923483
EGR2	0.326695	DULLARD	0.506378	KATNA1	0.752488	PARP6	0.834162
EI24	0.598829	DUSP12	0.444835	KATNB1	0.833426	PARP8	0.885518
EIF2AK2	0.284199	DUSP14	0.442907	KCTD5	0.763132	PBK	0.926434
EIF2C3	0.308862	DUSP2	0.221684	KDELR2	0.753106	PBLD	0.842908
ELAVL1	0.424822	DUSP3	0.389596	KIAA0020	0.782645	PCBD1	1.04038
ELSPBP1	-0.0189825	DYNC2LI1	0.349998	KIAA0152	0.765609	PCBP2	0.932201
EML3	0.20459	DYNLL1	0.191469	KIAA0174	0.922701	PCNT	0.99659
EMP1	0.281957	DYRK3	0.283061	KIAA0232	0.757993	PDCD6IP	0.855317
EMP3	0.202356	DYSF	0.0591474	KIAA0256	0.780722	PDGFRL	0.842831
ENC1	0.111377	E2F1	0.188911	KIAA0317	0.828629	PDIA6	0.994743
ENG	0.144399	E2F4	0.252586	KIAA0372	1.02945	PELI2	0.901436
ENPP4	0.42498	ECE1	0.12198	KIAA0746	1.00828	PET112L	0.889526
ENTPD1	0.109245	ECM1	0.0107084	KIAA0753	0.785519	PEX3	0.897432
ENTPD7	0.160332	EDG4	0.283194	KIAA0776	1.04791	PFAS	0.960039
EPAS1	0.0786655	EDG7	0.233605	KIAA0831	0.943046	PGM3	0.848826
EPHA1	0.205786	EEF1A1	0.0958776	KIAA0922	0.784298	PHF10	0.869401
EPHA2	0.234373	EFHD2	0.448492	KIAA1279	0.874265	PIAS1	0.819024
EPHB2	0.226901	EFNA1	0.191859	KIF15	0.779566	PIGG	0.986479
EPHX1	0.345532	EGFR	0.337038	KIF1B	0.913745	PIP5K3	0.963553
EPOR	0.192639	EGLN1	0.377645	KIF23	0.847214	PISD	0.915223
ERN2	0.0712722	EGR2	0.326695	KIF2A	0.849424	PKM2	0.806634
ERO1L	0.385645	EHD2	0.322851	KLHL2	0.923174	PLA2G12A	0.923887
ESR1	0.0962291	EI24	0.598829	KLHL23	0.902219	PLEKHA1	0.991891
ESRRA	0.316416	EIF2AK2	0.284199	KPNA3	0.824223	PLOD1	0.924062
ETV4	0.124652	EIF2C1	0.265045	KRR1	0.786271	PLSCR3	0.837675
ETV7	0.123224	EIF2C3	0.308862	KRT18	0.821012	PMS1	0.806941
EVC	0.235295	EIF4A2	0.257495	KRT8	0.83767	POLI	1.00151
EVI5	0.229415	EIF4G3	0.48992	LARP7	0.887197	POLR1D	0.815463
EWSR1	0.247128	ELAVL1	0.424822	LARS	0.864984	POLR2E	0.994173
EXO1	0.314892	ELSPBP1	-0.0189825	LARS2	0.939794	POLR2F	0.875426
EXOC7	0.408409	EML3	0.20459	LCMT1	0.782789	POLR3B	1.01343
EZH1	0.241225	EMP1	0.281957	LCMT2	0.852673	POLR3E	0.981733
EZH2	0.409109	EMP3	0.202356	LCN2	1.08425	POP5	0.874562
F13A1	0.0536032	ENG	0.144399	LDB1	0.866197	PPAT	0.800652
F2R	0.11282	ENO1	0.559109	LEPROTL1	0.928642	PPIB	0.927036
F3	0.328247	ENPP1	0.272396	LGR4	0.911026	PPID	1.09183
FABP5	0.252367	ENTPD1	0.109245	LIMK2	0.83808	PPIF	0.961435
FADS1	0.229208	ENTPD7	0.160332	LOC400506	1.02614	PPIG	0.82951
FADS2	0.310574	EPAS1	0.0786655	LOC57228	1.09236	PPL	1.09151
FAIM	0.284229	EPB41L1	0.282127	LPXN	0.81788	PPP1R9A	0.866749
FAM125B	0.164042	EPHA1	0.205786	LRPAP1	0.766732	PPP2R2A	0.970737
FAM129A	0.294962	EPHA2	0.234373	LRRC59	0.836178	PPP2R2D	0.880753
FAM3C	0.349824	EPHB2	0.226901	LTA4H	0.953965	PPP2R4	0.80707
FAM50B	0.266445	EPHX1	0.345532	LTBP3	0.764048	PPP2R5E	0.917082
FAM63A	0.222185	EPOR	0.192639	LYRM2	0.986851	PPP3CB	0.844153
FASTKD3	0.415446	EPS8	0.262216	LZTFL1	0.803319	PPP4C	0.911864
FBLN5	0.586799	ERCC2	0.285711	M-RIP	0.817962	PPP4R1	0.838729
FBN1	-0.143283	ERGIC3	0.343976	M6PRBP1	0.780877	PPP4R2	0.964601
FBXL7	0.166323	ERN2	0.0712722	MAEA	0.95751	PPP6C	0.840661
FBXO9	0.379111	ERO1L	0.385645	MAK10	0.918737	PPWD1	0.960051
FCHO1	0.218321	ESR1	0.0962291	MAN2B2	0.846175	PRDM4	0.84507
FER	0.175195	ESRRA	0.316416	MAP1LC3B	0.774923	PRKCD	0.812761
FEZ1	0.0823923	ETV4	0.124652	MAP7	0.78412	PRMT3	1.00864
FGF18	0.152693	ETV7	0.123224	MAPK6	0.882936	PRPF31	0.873846
FGL2	0.126022	EVC	0.235295	42434	0.870455	PRPSAP2	1.07712
FHL3	0.208611	EVI2A	0.306808	MARCKS	0.834333	PRRG4	0.806575
FILIP1L	-0.0679766	EVI5	0.229415	MAT2B	0.750308	PSMA3	0.80067
FKBP11	0.141803	EWSR1	0.247128	MBD1	0.782917	PSMB6	0.892124
FKBP1A	0.401591	EXO1	0.314892	ME2	0.771078	PSMD5	0.982696
FKBP8	0.192614	EXOC7	0.408409	MED6	0.839026	PTCD3	0.805552
FLJ10986	0.227948	EZH1	0.241225	MEN1	0.755424	PTEN	1.09897
FLJ20294	0.200645	EZH2	0.409109	METAP1	0.841174	PTPLAD1	0.851459
FLJ20309	0.123308	F3	0.328247	METAP2	0.855113	PTPN3	1.10545
FLJ20699	0.335319	FABP5	0.252367	METRN	0.785	PTPRK	0.815929
FLJ21865	0.224629	FADS1	0.229208	METTL9	0.935228	PTS	0.826986
FLJ22662	0.179133	FADS2	0.310574	MFAP1	0.895752	PWP1	0.820857
FLNC	0.160195	FAIM	0.284229	MFSD5	0.773018	PXDN	1.04001
FLOT1	0.378092	FAM117A	0.291454	MGMT	0.850942	QDPR	1.00022
FLRT2	0.198742	FAM125B	0.164042	MINPP1	0.795559	QPRT	0.809742
FMO4	0.352486	FAM129A	0.294962	MKNK2	1.01667	RAB11A	0.853082
FN1	-0.0989931	FAM3C	0.349824	MLF1IP	0.807875	RAD17	0.806007
FNBP4	0.360445	FAM49A	0.336602	MMP7	0.861152	RAD23B	1.02376
FNDC3B	0.34228	FAM50B	0.266445	MOCS2	0.934101	RALBP1	0.812294
FNDC4	0.0583827	FAM63A	0.222185	MPP5	0.803284	RAP1GAP	1.09805
FOS	0.220771	FAM65A	0.442583	MPPE1	0.808234	RARRES2	0.941024
FOSB	0.194661	FARP2	0.265805	MRFAP1L1	0.833842	RASA1	0.916195
FOSL2	0.0785951	FASTKD3	0.415446	MRPL16	0.888168	RBM13	0.817644
FOXC1	-0.100908	FBLN5	0.586799	MRPL23	0.926425	RBM22	0.800933
FOXJ1	0.492918	FBN1	-0.143283	MRPL39	0.837825	RBM26	0.816877
FRAP1	0.209723	FBXL7	0.166323	MRPL40	0.910365	RCBTB2	0.900318
FRZB	0.289139	FBXO9	0.379111	MRPL46	0.7552	RCN2	0.807731
FTL	0.454503	FCHO1	0.218321	MRPS11	0.779813	RDH11	0.839382
FUBP1	0.0441603	FER	0.175195	MRPS27	1.0248	REEP5	0.891678
FUZ	0.273432	FEZ1	0.0823923	MRPS31	0.864406	REV3L	0.943564
FXYD6	0.114843	FGF18	0.152693	MSLN	1.00542	REXO2	0.901635
G0S2	-0.156228	FGL2	0.126022	MTCH2	0.753538	RFC1	0.921639
GAA	0.244266	FHL3	0.208611	MTHFD1	0.763122	RFC5	1.05738
GADD45G	0.115028	FILIP1L	-0.0679766	MTIF2	0.773214	RGPD5	0.841082
GAL3ST4	0.0980533	FKBP10	0.287471	MTL5	0.849109	RHOB	0.973155
GALNACT-2	0.439967	FKBP11	0.141803	MTO1	0.91456	RHOT1	0.96427
GALNS	0.519892	FKBP1A	0.401591	MUS81	0.787279	RIC8A	0.829211
GALNT10	0.0329092	FKBP8	0.192614	MVP	0.787916	RIOK2	0.911041
GALNT14	0.406214	FLAD1	0.45495	MXI1	0.995888	RNF111	0.996664
GAMT	0.31012	FLJ10986	0.227948	MYCBP	0.791767	RNF34	0.929592
GAPDH	0.164634	FLJ20294	0.200645	MYL6B	0.80038	RNF40	0.862161
GATA6	-0.298901	FLJ20309	0.123308	NANOS1	0.952733	RPA1	0.860653
GATM	0.339132	FLJ20699	0.335319	NANS	0.895681	RPA2	0.874775
GBA	0.379694	FLJ21865	0.224629	NAP1L1	0.794061	RPA3	0.800231
GCA	0.423709	FLJ22662	0.179133	NAP1L4	0.88456	RPP14	0.884597
GCH1	0.403065	FLOT1	0.378092	NARS	0.810176	RRAS2	1.0482
GCNT1	0.262432	FLOT2	0.258408	NARS2	0.877457	RRM1	0.801245
GEM	0.245824	FMO4	0.352486	NAV2	0.843705	RUVBL2	0.80569
GEMIN4	0.450618	FN1	-0.0989931	NCLN	0.816617	SAE1	0.978096
GGA3	0.1775	FNDC3B	0.34228	NCOR1	0.96405	SAMM50	0.902931
GGH	0.517295	FNDC4	0.0583827	NDUFA5	0.766437	SART3	0.954738
GIMAP5	-0.027328	FOS	0.220771	NDUFA7	0.837774	SC4MOL	1.05605
GIMAP6	-0.0201094	FOSB	0.194661	NDUFA8	0.811673	SCAMP1	0.830833
GIT1	0.0899706	FOSL2	0.0785951	NDUFAF1	0.78804	SCAMP4	0.861377
GLG1	0.516683	FOXJ1	0.492918	NDUFC1	0.808597	SCAP	0.836867
GLI3	0.355075	FPGT	0.331759	NDUFS4	0.91748	SCYE1	0.929727
GLIPR1	0.186596	FRAP1	0.209723	NFIC	0.782546	SDC1	0.932839
GLRX	0.173551	FRG1	0.448798	NFYB	0.795521	SDF2	0.84255
GLT25D1	0.233948	FRZB	0.289139	NGLY1	0.796577	SDF2L1	0.939279
GM2A	0.299471	FTL	0.454503	NGRN	0.988633	SDHD	0.957019
GMDS	0.299272	FUBP1	0.0441603	NINJ1	0.789401	SEC24B	0.862769
GMEB1	0.210255	FUZ	0.273432	NIP30	0.887388	SEH1L	0.932538
GMIP	0.237512	FXN	0.636814	NISCH	0.806036	SEPHS2	0.827233
GNAQ	0.183955	FXYD3	0.319007	NKIRAS2	0.835091	SERINC1	0.821028
GNG11	0.093224	FXYD6	0.114843	NME3	0.835289	SERPINE2	0.806129
GNG4	0.00532499	FZD1	0.287449	NME5	1.01392	SETD2	0.813394
GNG7	0.245386	FZD7	0.455386	NMU	0.82571	SETD6	0.842131
GNPTAB	0.26519	G0S2	-0.156228	NOC3L	0.98802	SF3A2	0.905523
GOLGB1	0.240404	GAA	0.244266	NOL8	1.10281	SFRS2B	0.829843
GOSR1	0.341109	GABPB2	0.277667	NOLA1	0.758741	SGPL1	0.972967
GOSR2	0.12715	GADD45G	0.115028	NOSIP	0.919065	SH3YL1	0.967354
GPNMB	0.130055	GAL3ST4	0.0980533	NPTN	0.818865	SHOC2	0.801877
GPR1	0.141776	GALC	0.293657	NR3C1	0.769522	SKIV2L2	0.881834
GPR116	-0.016924	GALNACT-2	0.439967	NSMCE4A	0.830022	SLBP	0.831311
GPR137	0.0618379	GALNT14	0.406214	NSUN5	0.823515	SLC25A1	1.05236
GPR137B	0.114101	GAMT	0.31012	NT5C2	0.772152	SLC25A11	0.93481
GPR161	0.15653	GAPDH	0.164634	NTHL1	0.909006	SLC25A20	0.806044
GPR177	0.290976	GATA6	-0.298901	NUBP1	0.786711	SLC25A38	0.980967
GPRC5A	0.300015	GATM	0.339132	NUDT15	0.764092	SLC25A4	0.858871
GPRC5C	0.00619715	GBA	0.379694	NUDT9	1.02392	SLC30A9	0.896395
GPRIN2	0.180743	GCA	0.423709	NUP37	1.04947	SLC34A2	0.87368
GPSM3	0.015986	GCH1	0.403065	NUP43	0.892554	SLC35A1	0.807578
GPX3	0.027388	GCNT1	0.262432	NUP54	0.881417	SLC35F2	0.955469
GPX7	0.266162	GDF11	0.341397	NUP98	0.896054	SLC39A6	1.00659
GRB2	0.347981	GEMIN4	0.450618	OAT	0.899644	SLCO3A1	0.895023
GSK3A	0.146449	GFOD1	0.363422	OAZ2	0.809206	SMAD1	0.86305
GSPT1	0.562876	GGA1	0.4432	OBFC1	0.814315	SMAD4	0.97429
GSS	0.237521	GGA2	0.391381	OGDH	0.795411	SMARCC1	0.836397
GTDC1	0.188209	GGA3	0.1775	OGFOD1	0.77633	SMEK1	1.00325
GTF2IRD1	-0.10535	GGH	0.517295	OSBPL10	0.836062	SMUG1	0.894192
GTF3C4	0.307239	GIT1	0.0899706	OXSM	0.804105	SNAP29	0.839672
GTF3C5	0.171439	GLG1	0.516683	OXSR1	0.900516	SNAPC1	0.90051
GTPBP1	0.231124	GLI3	0.355075	P4HA1	0.95724	SNRK	0.815127
GUK1	0.176187	GLIPR1	0.186596	PACSIN2	1.02543	SNUPN	0.976172
GZMK	0.091313	GLRX	0.173551	PAFAH1B3	0.86879	SOD2	0.829317
H1F0	0.226903	GLS	0.271034	PALB2	0.796785	SORD	0.995639
H2AFX	0.16893	GLT25D1	0.233948	PAPOLA	0.802399	SPATA5L1	0.876025
H3F3A	0.187578	GLUL	0.289498	PAPSS1	0.872967	SPATS2	0.965388
H6PD	0.175601	GM2A	0.299471	PAQR3	0.766753	SPRY2	1.09039
HARS2	0.0348648	GMDS	0.299272	PARN	0.923483	SPTAN1	0.948692
HBA2	0.0118679	GMEB1	0.210255	PARP6	0.834162	SPTLC1	1.00551
HBB	0.16218	GMEB2	0.298571	PARP8	0.885518	SSSCA1	0.871633
HBP1	0.180354	GMIP	0.237512	PAXIP1	0.783931	ST5	0.880492
HDAC11	0.211379	GNA15	0.388822	PBK	0.926434	STAM	0.814185
HDAC7A	0.249132	GNAI2	0.36268	PBLD	0.842908	STX12	0.809018
HES1	0.148821	GNAQ	0.183955	PCBD1	1.04038	STX4	0.889209
HEXIM1	0.261208	GNAS	0.281822	PCBP2	0.932201	SUCLG2	0.807615
HEY1	0.302786	GNB2	0.335125	PCCA	0.785915	SYNCRIP	0.802275
HIP1	0.284268	GNG4	0.00532499	PCID2	0.775292	TAF5	0.958835
HIPK2	0.341864	GNG7	0.245386	PCM1	0.767472	TAF9	0.826211
HIST1H1D	-0.00727316	GNPTAB	0.26519	PCNT	0.99659	TBPL1	0.860235
HIST1H2AC	0.44274	GOLGB1	0.240404	PDCD6IP	0.855317	TDG	1.03176
HIST1H2AE	0.243717	GOLPH3L	0.321601	PDGFC	0.910222	TEGT	0.833941
HIST1H2BD	0.282372	GOSR1	0.341109	PDGFRL	0.842831	TERF2	0.878958
HIST1H2BE	-0.0476741	GOSR2	0.12715	PDIA6	0.994743	TFPT	0.865672
HIST1H2BF	-0.0433013	GPI	0.281278	PELI2	0.901436	TGDS	0.820896
HIST1H2BH	0.0287041	GPR1	0.141776	PELO	0.768844	THAP11	0.857275
HIST1H2BI	0.0841019	GPR137	0.0618379	PELP1	0.76515	THG1L	0.810414
HIST1H2BN	0.0281527	GPR137B	0.114101	PEO1	0.759679	THOC1	0.821626
HIST1H3G	0.0426791	GPR161	0.15653	PET112L	0.889526	THOC7	0.817591
HIST1H3H	0.0783978	GPR177	0.290976	PEX3	0.897432	THUMPD1	1.02468
HIST1H4C	0.171659	GPRC5A	0.300015	PFAS	0.960039	TIMELESS	0.803134
HIST1H4I	0.0599535	GPRIN2	0.180743	PFDN5	0.76843	TIMM13	1.0899
HIST2H2BE	0.13189	GPX7	0.266162	PGM3	0.848826	TIMM9	0.845654
HIST3H2A	0.340591	GRB2	0.347981	PGRMC2	0.871291	TIPIN	0.928577
HLA-A	0.187639	GSK3A	0.146449	PHF10	0.869401	TJP3	0.837614
HLA-B	0.422298	GSPT1	0.562876	PHF2	0.910907	TM2D3	0.824491
HLA-DMA	-0.172991	GSS	0.237521	PIAS1	0.819024	TMEM106C	0.928965
HLA-DMB	0.0955309	GTDC1	0.188209	PIGG	0.986479	TMEM118	0.953696
HLA-DQB1	0.0487463	GTF2IRD1	-0.10535	PIP5K1C	0.772064	TMEM33	0.97066
HLA-DRA	-0.106484	GTF3C4	0.307239	PIP5K3	0.963553	TMEM48	0.904026
HLA-F	0.178053	GTF3C5	0.171439	PISD	0.915223	TMEM50B	0.844598
HLA-G	0.0942912	GTPBP1	0.231124	PKM2	0.806634	TMPO	0.852017
HMGCS1	0.247249	GTPBP3	0.300495	PLA2G12A	0.923887	TNFAIP8	0.886639
HMOX1	0.562579	GUK1	0.176187	PLEKHA1	0.991891	TOB1	0.859951
HN1	0.506686	GZMK	0.091313	PLEKHF2	0.754666	TP53I3	0.913115
HNMT	0.0283039	H1F0	0.226903	PLOD1	0.924062	TPD52L1	0.84231
HNRPH1	0.183234	H2AFV	0.312943	PLSCR3	0.837675	TPM1	0.892788
HNRPK	0.263751	H2AFX	0.16893	PMPCA	0.883047	TRAP1	0.965573
HNRPM	0.24459	H3F3A	0.187578	PMS1	0.806941	TREX1	0.917567
HOXB2	0.196343	H6PD	0.175601	PNKP	0.783	TRIAP1	0.824635
HOXB5	0.0741345	HARS2	0.0348648	PNMA1	0.794575	TRIM2	0.862177
HOXD1	0.238456	HBB	0.16218	PODXL	0.797371	TRIM28	0.942267
HRASLS3	0.369625	HBEGF	0.281201	POLI	1.00151	TRIM32	0.923641
HSD11B1	-0.0185969	HBP1	0.180354	POLR1D	0.815463	TRIM68	1.00326
HSD17B1	0.137675	HCP5	0.638215	POLR2B	0.789016	TRIM8	0.873075
HSD17B12	0.222121	HDAC11	0.211379	POLR2E	0.994173	TRIP6	0.942808
HSD17B14	0.0363471	HDAC7A	0.249132	POLR2F	0.875426	TRSPAP1	0.8145
HSPA1A	0.111505	HES1	0.148821	POLR3B	1.01343	TSEN34	0.868147
HSPA1L	0.172102	HEXIM1	0.261208	POLR3E	0.981733	TSG101	0.956882
HSPA5	0.384811	HIP1	0.284268	POLR3K	0.753987	TSPAN3	1.01726
HSPA8	-0.0544134	HIPK2	0.341864	POP5	0.874562	TST	0.80873
HSPB8	0.220978	HIST1H1D	-0.00727316	PPAT	0.800652	TTC3	0.812262
HSPD1	0.214919	HIST1H2AC	0.44274	PPIB	0.927036	TTLL12	0.864008
HSPE1	0.427785	HIST1H2AE	0.243717	PPIF	0.961435	TWSG1	1.01572
ICAM1	0.132566	HIST1H2BD	0.282372	PPIG	0.82951	TXNL1	0.839654
ICK	0.249693	HIST1H2BH	0.0287041	PPP1R9A	0.866749	TYMS	0.978042
ICT1	0.457984	HIST1H2BI	0.0841019	PPP2R2A	0.970737	U2AF1	0.858392
ID1	0.399897	HIST1H2BN	0.0281527	PPP2R2D	0.880753	UBE2D3	0.923873
ID2	0.553011	HIST1H3G	0.0426791	PPP2R4	0.80707	UBE2M	0.875788
ID3	0.25307	HIST1H3H	0.0783978	PPP2R5E	0.917082	UBE2S	0.926578
IER3	-0.0268476	HIST1H4C	0.171659	PPP3CB	0.844153	UBE3A	0.927505
IER5	0.266022	HIST1H4I	0.0599535	PPP4C	0.911864	UFD1L	0.938937
IFI16	-0.130468	HIST2H2BE	0.13189	PPP4R1	0.838729	UFM1	0.842632
IFI30	0.0360756	HIST3H2A	0.340591	PPP4R2	0.964601	UGDH	1.03498
IFIH1	0.249503	HIVEP2	0.472391	PPP6C	0.840661	UNG	0.849339
IFITM1	0.222897	HLA-A	0.187639	PPWD1	0.960051	UQCR	0.848306
IFITM2	0.291892	HLA-B	0.422298	PRDM4	0.84507	USP10	1.09308
IFNAR2	0.250646	HLA-DMB	0.0955309	PRKCD	0.812761	USP14	0.903018
IFT122	0.482856	HLA-DOB	0.304157	PRMT1	0.875997	USP4	1.039
IGFBP4	0.428831	HLA-E	0.4754	PRMT3	1.00864	USP47	0.882064
IGFBP7	0.305844	HLA-F	0.178053	PRPF31	0.873846	USP52	0.868448
IHH	0.0556104	HLA-G	0.0942912	PRR13	0.764438	UVRAG	0.826081
IKBKE	-0.0244391	HMGCS1	0.247249	PRRG4	0.806575	VIL2	0.992889
IKZF5	0.161541	HMGN2	0.353236	PRSS8	0.783229	VPS26A	0.808776
IL11RA	0.232677	HMOX1	0.562579	PSCD2	0.768914	VPS4A	0.879064
IL15	0.550825	HN1	0.506686	PSIP1	0.777302	VPS4B	0.863214
IL15RA	0.159499	HNMT	0.0283039	PSMA3	0.80067	VTI1B	1.01244
IL17RB	0.342656	HNRPH1	0.183234	PSMA4	0.780047	WASF1	0.896353
IL17RC	0.144957	HNRPK	0.263751	PSMB6	0.892124	WASF3	0.927655
IL1R1	0.165598	HOMER3	0.271452	PSMD13	0.798154	WDR19	1.07981
IL1RAP	0.327613	HOXB2	0.196343	PSMD5	0.982696	WDR7	1.01403
IL32	0.0095941	HOXB5	0.0741345	PTCD3	0.805552	WDR73	0.92861
IL4R	0.304734	HOXD1	0.238456	PTEN	1.09897	XPO7	0.814691
IL6R	0.211294	HPS1	0.291834	PTGS1	0.888798	XTP3TPA	0.849801
IL7R	-0.0222036	HRASLS3	0.369625	PTPLAD1	0.851459	YES1	0.905252
IL8	0.19608	HSD11B1	-0.0185969	PTPN3	1.10545	YIF1A	0.88247
ILF2	0.396441	HSD17B12	0.222121	PTPN4	0.751741	ZBED5	0.898858
INSR	0.224773	HSD17B14	0.0363471	PTPRK	0.815929	ZBTB24	0.848066
INTS3	0.187147	HSD17B8	0.442437	PTS	0.826986	ZBTB43	0.80011
IQCG	0.0042408	HSF1	0.281766	PWP1	0.820857	ZCCHC10	0.890977
IQGAP2	0.122663	HSPA1A	0.111505	PXDN	1.04001	ZDHHC13	1.07751
IQSEC1	0.210164	HSPA1L	0.172102	QDPR	1.00022	ZDHHC4	0.82045
IRF8	-0.05843	HSPA5	0.384811	QPRT	0.809742	ZDHHC6	0.936787
ISG20L1	0.222446	HSPB8	0.220978	RAB11A	0.853082	ZDHHC7	1.01187
ISG20L2	0.325247	HSPD1	0.214919	RAB38	0.769969	ZFAND5	0.969624
ISLR	-0.120376	HSPE1	0.427785	RAB6IP1	0.757462	ZFP106	1.00425
ITCH	0.248581	ICAM1	0.132566	RAD17	0.806007	ZMYM2	0.926469
ITGA5	0.122899	ICK	0.249693	RAD23B	1.02376	ZNF12	0.807094
ITGA6	0.264198	ICT1	0.457984	RAD50	0.78289	ZNF140	1.06158
ITGA7	0.335555	ID1	0.399897	RALBP1	0.812294	ZNF22	1.06781
ITGB1	0.139962	ID2	0.553011	RANBP5	0.779026	ZNF232	0.979127
ITGB2	0.1654	ID3	0.25307	RAPGEF6	0.762059	ZNF26	0.935264
ITGB5	-0.0318824	IDH1	0.358759	RARRES2	0.941024	ZNF271	0.868479
ITPR2	0.168617	IER5	0.266022	RARS	0.777527	ZNF415	1.00394
ITSN2	0.149595	IFI16	-0.130468	RASA1	0.916195	ZNF532	1.05112
JAG1	0.331741	IFI30	0.0360756	RASSF7	0.781128	ZNF84	0.966627
JAM3	-0.00105545	IFI6	0.892538	RBM13	0.817644	ZNF91	1.0039
JMJD4	0.197531	IFIH1	0.249503	RBM22	0.800933
JRK	0.123417	IFITM1	0.222897	RBM26	0.816877
JTB	0.23971	IFITM2	0.291892	RBM7	0.753393
KBTBD4	0.355303	IFNAR2	0.250646	RCBTB2	0.900318
KCNH2	0.0876938	IFRD2	0.460733	RCN2	0.807731
KCNK15	0.0317244	IFT122	0.482856	RDH11	0.839382
KCNN4	0.201002	IGFBP4	0.428831	RDH14	0.787022
KCNS1	0.0571565	IGFBP6	0.386391	REEP5	0.891678
KCNS3	0.186884	IGFBP7	0.305844	REV3L	0.943564
KCTD15	0.164067	IGHMBP2	0.272131	REXO2	0.901635
KCTD2	0.224737	IHH	0.0556104	RFC1	0.921639
KHDRBS1	0.0870885	IKZF5	0.161541	RFC4	0.773438
KIAA0195	0.24497	IL11RA	0.232677	RGPD5	0.841082
KIAA0241	0.235845	IL15	0.550825	RHOB	0.973155
KIAA0319L	0.367571	IL15RA	0.159499	RHOT1	0.96427
KIAA0460	0.273571	IL17RB	0.342656	RIC8A	0.829211
KIAA0494	0.49994	IL17RC	0.144957	RIOK2	0.911041
KIAA0828	0.222248	IL1R1	0.165598	RNF111	0.996664
KIAA0892	0.22588	IL1RAP	0.327613	RNF126	0.789777
KIAA0895	0.445477	IL4R	0.304734	RNF34	0.929592
KIAA1199	-0.114022	IL6R	0.211294	RNF4	0.796664
KIAA1539	0.283318	IL8	0.19608	RNF40	0.862161
KIF13B	0.402507	ILF2	0.396441	RPA1	0.860653
KIF20A	0.636576	INPP1	0.255073	RPA2	0.874775
KIF5C	0.141016	INSIG2	0.430669	RPA3	0.800231
KIFC1	0.331344	INSR	0.224773	RPP14	0.884597
KIRREL	0.164198	INTS3	0.187147	RRAS2	1.0482
KLF3	0.183768	IPO4	0.588438	RRM1	0.801245
KLHL20	0.281989	IQCG	0.0042408	RUVBL2	0.80569
KLHL25	0.268695	IQSEC1	0.210164	RWDD1	0.798365
KLK10	0.29809	ISG20L1	0.222446	SACS	0.755078
KLK7	0.156641	ISG20L2	0.325247	SAE1	0.978096
KLK8	0.0449934	ITCH	0.248581	SAMM50	0.902931
KRCC1	0.168885	ITGA5	0.122899	SART3	0.954738
KRT19	0.258111	ITGA6	0.264198	SCAMP1	0.830833
KRT7	0.199855	ITGA7	0.335555	SCAMP4	0.861377
KRT81	0.159761	ITGB1	0.139962	SCAP	0.836867
LACTB2	0.398735	ITGB2	0.1654	SCYE1	0.929727
LAD1	0.158442	ITPR2	0.168617	SDC1	0.932839
LAIR1	0.0019194	ITPR3	0.278059	SDF2	0.84255
LAMA4	0.346184	ITSN2	0.149595	SDF2L1	0.939279
LAMB3	0.253871	JAG1	0.331741	SDHD	0.957019
LAMC1	0.227086	JMJD4	0.197531	SEC11A	0.755254
LAMC2	-0.0365819	JRK	0.123417	SEC23IP	0.765557
LAP3	0.802213	JTB	0.23971	SEC24B	0.862769
LCP1	-0.023941	JUN	0.45393	SEH1L	0.932538
LDLR	0.166697	KBTBD4	0.355303	SEPHS2	0.827233
LEFTY2	0.116174	KCNH2	0.0876938	SERINC1	0.821028
LEPROT	0.522237	KCNK15	0.0317244	SERPINE2	0.806129
LGALS3	0.398436	KCNN4	0.201002	SETD2	0.813394
LGALS3BP	0.30163	KCNS1	0.0571565	SETD6	0.842131
LGALS8	0.206473	KCNS3	0.186884	SF3A2	0.905523
LHFP	0.0671527	KCTD15	0.164067	SFRS2B	0.829843
LHX6	0.0841879	KCTD2	0.224737	SFRS9	0.796826
LILRB3	-0.0528217	KCTD9	0.827679	SGPL1	0.972967
LIMS1	0.507145	KHDRBS1	0.0870885	SH3YL1	0.967354
LLGL2	0.285616	KIAA0195	0.24497	SHOC2	0.801877
LMNA	-0.11586	KIAA0241	0.235845	SKIV2L2	0.881834
LMO2	0.151147	KIAA0319L	0.367571	SLBP	0.831311
LOC440348	0.0135501	KIAA0460	0.273571	SLC25A11	0.93481
LOC93349	0.0622236	KIAA0494	0.49994	SLC25A20	0.806044
LPHN1	0.236702	KIAA0828	0.222248	SLC25A38	0.980967
LPPR2	0.0898273	KIAA0859	0.418264	SLC25A4	0.858871
LRP3	0.226439	KIAA0892	0.22588	SLC25A46	0.786474
LRRC42	0.415646	KIAA0895	0.445477	SLC26A2	0.787322
LRRC51	-0.0806786	KIAA1199	-0.114022	SLC30A9	0.896395
LSM5	0.330074	KIAA1539	0.283318	SLC34A2	0.87368
LTB	0.168534	KIF13B	0.402507	SLC35A1	0.807578
LUM	-0.185043	KIF20A	0.636576	SLC35F2	0.955469
LXN	0.233322	KIF5C	0.141016	SLC39A6	1.00659
LY6G6C	0.152169	KIFC1	0.331344	SLC7A5	0.788516
LY86	-0.00358627	KIRREL	0.164198	SLCO3A1	0.895023
LYL1	-0.0238196	KLC2	0.275567	SLTM	0.765756
MADCAM1	0.0430851	KLF3	0.183768	SMAD1	0.86305
MAF	0.13799	KLHL20	0.281989	SMAD4	0.97429
MAFB	0.201473	KLHL25	0.268695	SMARCC1	0.836397
MAL	-0.279347	KLK10	0.29809	SMEK1	1.00325
MAN1C1	0.0833664	KLK5	0.460343	SMUG1	0.894192
MAN2B1	0.254414	KLK7	0.156641	SNAP29	0.839672
MAP3K10	0.0511562	KRCC1	0.168885	SNAPC1	0.90051
MAP4K4	0.480399	KRT19	0.258111	SNRK	0.815127
MAPBPIP	0.298101	KRT7	0.199855	SNRPA1	0.782402
MAPK8IP1	0.119656	KRT81	0.159761	SNUPN	0.976172
MAPKAPK2	0.113025	LACTB2	0.398735	SOCS5	0.786795
MARCKSL1	0.0652356	LAD1	0.158442	SOD2	0.829317
MAT2A	0.160223	LAMA4	0.346184	SORD	0.995639
MATN2	0.0617371	LAMB3	0.253871	SORL1	0.788596
MBD2	0.172411	LAMC1	0.227086	SPAG7	0.753736
MBD5	0.446059	LAMC2	-0.0365819	SPATA5L1	0.876025
MBTD1	0.104356	LAMP3	0.308286	SPATS2	0.965388
MCAM	0.131913	LAP3	0.802213	SPTAN1	0.948692
MCL1	0.118168	LDLR	0.166697	SPTLC1	1.00551
MCM7	0.291162	LEF1	0.39684	SSB	0.792663
MCOLN1	0.39014	LEFTY2	0.116174	SSSCA1	0.871633
MDK	0.264519	LEPRE1	0.260263	ST5	0.880492
ME1	0.452815	LEPROT	0.522237	STAM	0.814185
MED18	0.185604	LGALS1	0.259977	STX12	0.809018
MEF2C	0.184056	LGALS3	0.398436	STX4	0.889209
MEGF6	0.0744056	LGALS8	0.206473	STX8	0.772953
MEIS1	0.221771	LHFPL2	0.270436	SUCLG2	0.807615
MET	0.187956	LHX6	0.0841879	SUPT4H1	0.765641
METTL7A	0.14368	LIMS1	0.507145	SUV420H1	0.784903
MFGE8	0.354202	LLGL2	0.285616	SYNCRIP	0.802275
MFHAS1	0.303086	LMNB1	0.496741	SYNE2	0.880166
MGAT4A	0.18104	LMO2	0.151147	TAF5	0.958835
MGC4172	0.260758	LOC440348	0.0135501	TAF9	0.826211
MGLL	0.0937603	LOC51035	0.322485	TBPL1	0.860235
MGP	-0.0452632	LPHN1	0.236702	TCF12	0.784067
MICAL1	0.253414	LPHN2	0.278301	TCP1	0.768545
MICAL2	0.21033	LPPR2	0.0898273	TDG	1.03176
MICB	0.33084	LRCH4	0.254186	TEGT	0.833941
MIR16	0.534014	LRFN3	0.258534	TERF2	0.878958
MIZF	0.453389	LRP10	0.339902	TFPT	0.865672
MKI67	0.142543	LRP3	0.226439	TGDS	0.820896
MLX	0.473275	LRRC42	0.415646	THAP11	0.857275
MMD	0.413041	LRRC61	0.293737	THG1L	0.810414
MMP14	0.144704	LSM5	0.330074	THOC1	0.821626
MMP19	0.00917655	LTB	0.168534	THOC7	0.817591
MMP2	0.0490448	LUC7L2	0.443175	THUMPD1	1.02468
MMP24	0.102007	LUM	-0.185043	TIA1	0.76571
MMP3	0.0670629	LXN	0.233322	TICAM1	0.7638
MMRN2	0.343775	LY6G6C	0.152169	TIMELESS	0.803134
MNAT1	0.532219	MAFB	0.201473	TIMM9	0.845654
MOCS1	0.232637	MAN1A2	0.284153	TIPIN	0.928577
MORN1	0.011835	MAN1C1	0.0833664	TJP1	0.773134
MOSC2	-0.0121835	MAN2B1	0.254414	TJP3	0.837614
MPDU1	0.723885	MAP2K6	0.259631	TM2D3	0.824491
MPP2	0.158279	MAP3K10	0.0511562	TMEM106C	0.928965
MRC2	0.204355	MAP3K8	0.293699	TMEM118	0.953696
MREG	0.424968	MAP4K4	0.480399	TMEM135	0.796436
MRM1	0.0117683	MAPBPIP	0.298101	TMEM16K	0.793314
MRPL24	0.282861	MAPK14	0.380287	TMEM33	0.97066
MRPL52	0.233421	MAPK8IP1	0.119656	TMEM48	0.904026
MRPS14	0.374364	MAPKAPK2	0.113025	TMEM50B	0.844598
MRPS30	0.430208	MAPRE1	0.264262	TMEM93	0.782
MRPS7	0.421517	MAST2	0.291685	TMPO	0.852017
MS4A6A	0.376396	MAT2A	0.160223	TNFAIP8	0.886639
MSRA	0.430775	MATN2	0.0617371	TOB1	0.859951
MST1	0.370106	MBD2	0.172411	TP53BP1	0.786955
MSX1	0.240688	MBD5	0.446059	TP53I3	0.913115
MT1X	0.0210283	MBOAT5	0.292382	TPD52L1	0.84231
MTMR11	0.168994	MBTD1	0.104356	TPM1	0.892788
MTMR12	0.241849	MCAM	0.131913	TRAP1	0.965573
MTR	0.392341	MCL1	0.118168	TREX1	0.917567
MTX1	0.344789	MCM4	0.30726	TRIAP1	0.824635
MUC1	-0.180007	MCM7	0.291162	TRIB2	0.764212
MVK	0.123298	MCOLN1	0.39014	TRIM2	0.862177
MXRA8	-0.114044	ME1	0.452815	TRIM28	0.942267
MYH11	0.0686332	MED18	0.185604	TRIM32	0.923641
MYL4	0.0416849	MED25	0.354354	TRIM5	0.750044
MYLK	0.234956	MED9	0.250122	TRIM52	0.782681
MYLPF	0.153195	MEF2C	0.184056	TRIM68	1.00326
MYO1B	0.287405	MEGF6	0.0744056	TRIM8	0.873075
MYO1C	0.43071	MEIS1	0.221771	TRIP6	0.942808
MYO1F	-0.0144229	MET	0.187956	TRSPAP1	0.8145
MYO9B	0.245858	METT11D1	0.279594	TSEN34	0.868147
MYOHD1	0.155644	METTL3	0.270612	TSG101	0.956882
MYST3	0.378484	METTL7A	0.14368	TSPAN3	1.01726
NAT9	0.295903	MFGE8	0.354202	TSPYL1	0.79606
NBL1	0.256151	MFHAS1	0.303086	TSPYL4	0.788471
NBR1	0.17415	MGAT4A	0.18104	TSSC1	0.770824
NCDN	0.185005	MGC4172	0.260758	TST	0.80873
NCK1	0.400062	MGP	-0.0452632	TTC3	0.812262
NCOR2	0.108498	MICAL1	0.253414	TTK	1.04015
NDN	0.117157	MICAL2	0.21033	TTLL12	0.864008
NDRG2	0.146033	MICB	0.33084	TWSG1	1.01572
NDST1	0.0588583	MIR16	0.534014	TXN	0.921913
NDUFB3	0.237866	MIZF	0.453389	TXNL1	0.839654
NEDD9	0.1616	MKI67	0.142543	TXNRD1	0.797668
NEK1	0.387822	MLX	0.473275	TYMS	0.978042
NEK11	0.0502515	MLXIP	0.276874	U2AF1	0.858392
NEK9	0.208671	MMD	0.413041	UBE2D3	0.923873
NES	0.362671	MMP14	0.144704	UBE2M	0.875788
NEUROD6	0.00683803	MMP19	0.00917655	UBE2N	0.762305
NF1	0.136116	MMP2	0.0490448	UBE2S	0.926578
NFAT5	0.233086	MMP24	0.102007	UBE3A	0.927505
NFE2L1	0.393114	MMP3	0.0670629	UEVLD	0.752146
NFE2L3	0.375214	MMRN2	0.343775	UFD1L	0.938937
NFKBIE	0.316423	MNAT1	0.532219	UFM1	0.842632
NFRKB	0.262553	MOCS1	0.232637	UGDH	1.03498
NFS1	0.253721	MORN1	0.011835	UNG	0.849339
NIBP	0.209992	MPDU1	0.723885	UQCR	0.848306
NID2	0.272053	MPP2	0.158279	USP14	0.903018
NINJ2	0.0356132	MRC2	0.204355	USP3	0.765118
NIPBL	0.307243	MREG	0.424968	USP4	1.039
NMD3	0.212224	MRPL24	0.282861	USP47	0.882064
NMI	0.258767	MRPL3	0.26964	USP52	0.868448
NNMT	0.0772486	MRPL52	0.233421	UTP20	0.760756
NOS1AP	0.134516	MRPL9	0.296425	UVRAG	0.826081
NOTCH1	0.410615	MRPS14	0.374364	VDAC1	0.751387
NOTCH3	0.182216	MRPS30	0.430208	VIL2	0.992889
NOV	0.15316	MRPS7	0.421517	VPS13C	0.902025
NOX5	-0.0399488	MS4A6A	0.376396	VPS26A	0.808776
NP	-0.0658346	MSRA	0.430775	VPS33B	0.775953
NPAL2	0.206852	MST1	0.370106	VPS4A	0.879064
NPC2	0.651256	MSX1	0.240688	VPS4B	0.863214
NPDC1	0.21901	MTMR11	0.168994	VTI1B	1.01244
NPEPL1	0.109976	MTMR12	0.241849	WARS	0.765736
NPEPPS	0.234771	MTR	0.392341	WASF1	0.896353
NPFFR1	-0.0402128	MTX1	0.344789	WASF3	0.927655
NPHP4	0.262574	MUC1	-0.180007	WBSCR22	0.767874
NPR1	0.124877	MVK	0.123298	WDR1	0.763332
NPTX2	0.207885	MXD3	0.257524	WDR7	1.01403
NQO1	0.00502048	MYC	0.323781	WDR73	0.92861
NR1D1	0.116903	MYH11	0.0686332	WDR74	0.778143
NR2F1	0.175899	MYL4	0.0416849	WEE1	0.7551
NR2F6	0.249201	MYL9	0.291441	WHSC2	0.760566
NR4A1	0.0833621	MYLK	0.234956	WRB	0.789242
NR4A2	0.00834118	MYLPF	0.153195	WRN	0.765391
NRD1	0.493711	MYO1B	0.287405	WSB2	0.758426
NRIP1	0.422183	MYO1C	0.43071	XAB1	0.760499
NRSN2	0.285754	MYO1F	-0.0144229	XBP1	0.788391
NSF	0.447123	MYO5C	0.828449	XPA	0.771489
NT5C	0.217087	MYO9B	0.245858	XPO7	0.814691
NTAN1	0.0071339	MYOHD1	0.155644	XTP3TPA	0.849801
NUAK2	0.334952	MYOZ1	0.286255	YEATS4	0.76992
NUP188	0.256691	MYST3	0.378484	YES1	0.905252
NUP214	0.291667	NAB1	0.276646	YIF1A	0.88247
NUS1	0.491442	NACA	0.290063	YKT6	0.759949
OAS1	0.129521	NAT13	0.269548	ZBED5	0.898858
OAS2	0.0603845	NAT9	0.295903	ZBTB24	0.848066
OAS3	0.233031	NBR1	0.17415	ZBTB43	0.80011
OGFR	0.149285	NCDN	0.185005	ZCCHC10	0.890977
OLFML2B	-0.235759	NCK1	0.400062	ZCCHC8	0.798044
OLFML3	0.295314	NCOR2	0.108498	ZDHHC4	0.82045
OSGEP	0.117052	NDN	0.117157	ZDHHC6	0.936787
OVGP1	0.143107	NDRG2	0.146033	ZDHHC7	1.01187
P2RY6	0.0829066	NDST1	0.0588583	ZFAND5	0.969624
PABPC1	0.219585	NDUFAB1	0.628565	ZFP106	1.00425
PABPC3	-0.0667561	NDUFB3	0.237866	ZMYM2	0.926469
PABPN1	0.195689	NDUFB4	0.292171	ZNF12	0.807094
PADI1	0.0327138	NEDD9	0.1616	ZNF232	0.979127
PADI2	0.172034	NEIL3	0.276432	ZNF26	0.935264
PAFAH1B2	0.225173	NEK1	0.387822	ZNF271	0.868479
PAFAH2	0.21415	NEK9	0.208671	ZNF304	0.792361
PALLD	0.365389	NES	0.362671	ZNF32	0.799493
PALM	0.394737	NF1	0.136116	ZNF415	1.00394
PALMD	0.262311	NFAT5	0.233086	ZNF432	0.768699
PAPSS2	0.216521	NFATC3	0.294627	ZNF468	0.782776
PARC	0.231066	NFE2L1	0.393114	ZNF580	0.754861
PARP2	0.202657	NFE2L3	0.375214	ZNF83	0.758836
PARVA	0.432806	NFKBIB	0.25615	ZNF84	0.966627
PATZ1	0.326679	NFKBIE	0.316423	ZNF91	1.0039
PCCB	0.40812	NFRKB	0.262553
PCDH12	-0.0244211	NFS1	0.253721
PCDH17	0.131811	NIBP	0.209992
PCDHB12	0.0135296	NID2	0.272053
PCDHGA10	0.203751	NINJ2	0.0356132
PCF11	0.0803042	NIPBL	0.307243
PCK1	0.0377537	NMD3	0.212224
PCK2	0.225595	NMI	0.258767
PCP4	0.370845	NMT1	0.422862
PCTK3	0.0627984	NNMT	0.0772486
PCTP	0.410406	NOD1	0.316406
PDAP1	0.160262	NOS1AP	0.134516
PDE4C	0.0151417	NOTCH1	0.410615
PDE4DIP	0.191544	NOTCH3	0.182216
PDE9A	0.160637	NOV	0.15316
PDGFD	0.101985	NP	-0.0658346
PDGFRA	0.2284	NPAL2	0.206852
PDK1	0.017328	NPC2	0.651256
PDLIM4	0.413847	NPDC1	0.21901
PDZK1IP1	0.618605	NPEPL1	0.109976
PDZRN3	-0.0486735	NPEPPS	0.234771
PEA15	0.259612	NPHP4	0.262574
PECI	0.170798	NPR1	0.124877
PEF1	0.476409	NR1D1	0.116903
PELI1	0.447746	NR2F6	0.249201
PER3	0.208349	NR4A1	0.0833621
PFTK1	0.405877	NRD1	0.493711
PGM1	0.515609	NRIP1	0.422183
PHACTR1	0.294347	NRSN2	0.285754
PHC2	0.349995	NSD1	0.31472
PHGDH	-0.118831	NSF	0.447123
PHLDA2	0.381946	NSL1	0.296914
PHLDA3	0.234787	NT5C	0.217087
PHLDB1	0.17782	NUAK2	0.334952
PHOX2A	-0.0144123	NUP188	0.256691
PI3	0.210374	NUP210	0.28887
PIGC	0.517238	NUP214	0.291667
PIGO	0.333432	NUS1	0.491442
PIK3C2B	0.223623	NXF1	0.290591
PIK3CD	0.194683	OAS1	0.129521
PIK3R2	0.244821	OAS2	0.0603845
PILRB	0.0396523	OAS3	0.233031
PINK1	0.290378	OCA2	0.296143
PKNOX1	0.265742	OGFR	0.149285
PLAGL2	0.306943	OLFML2B	-0.235759
PLAT	-0.00704831	OLFML3	0.295314
PLAU	0.469375	OSGEP	0.117052
PLAUR	0.145969	OSR2	0.321058
PLCB1	0.271662	OVGP1	0.143107
PLCB2	0.0537656	OVOL2	0.286346
PLCB4	0.435752	P2RY6	0.0829066
PLCG2	0.703317	PABPC1	0.219585
PLCL2	0.0975634	PABPC3	-0.0667561
PLEK2	0.473593	PABPN1	0.195689
PLEKHA9	0.235329	PADI1	0.0327138
PLEKHB2	0.297503	PADI2	0.172034
PLEKHG3	0.153141	PAFAH1B2	0.225173
PLEKHM1	0.100655	PAFAH2	0.21415
PLEKHO1	0.151736	PAIP1	0.433187
PLEKHQ1	0.297066	PALLD	0.365389
PLK1	0.161009	PALM	0.394737
PLK2	0.612196	PALMD	0.262311
PLK3	0.0676413	PANK3	0.273619
PLOD3	0.316592	PAPSS2	0.216521
PLSCR1	0.26765	PARC	0.231066
PLSCR4	0.237964	PARP2	0.202657
PLTP	0.355602	PARP3	0.383023
PLVAP	-0.00709004	PARVA	0.432806
PMAIP1	0.418501	PATZ1	0.326679
PMF1	0.356785	PAX8	0.334437
PMS2	0.134482	PCCB	0.40812
PMS2L3	0.184405	PCDH17	0.131811
PMVK	0.464465	PCDHB12	0.0135296
PNN	0.396696	PCDHGA10	0.203751
PNOC	0.260415	PCF11	0.0803042
PNPLA2	0.194861	PCK1	0.0377537
POFUT1	0.231043	PCK2	0.225595
POLH	0.252722	PCP4	0.370845
POLR1B	0.0247225	PCTK3	0.0627984
POLR2A	0.0861374	PCTP	0.410406
POLR3C	0.181942	PDAP1	0.160262
POMP	0.496373	PDE4DIP	0.191544
POMT2	0.162839	PDGFD	0.101985
PON2	0.186512	PDGFRA	0.2284
POU2F1	0.359737	PDLIM4	0.413847
PPAP2A	0.384663	PDZD2	0.358913
PPARD	0.181092	PDZK1IP1	0.618605
PPFIBP1	0.206077	PEA15	0.259612
PPIA	0.297617	PECI	0.170798
PPIC	0.458309	PECR	0.297432
PPP1CB	0.189776	PEF1	0.476409
PPP1R10	0.146553	PELI1	0.447746
PPP1R16B	0.13674	PEPD	0.440183
PPP1R3C	0.170747	PER1	0.262434
PPP2R3A	0.366661	PER2	0.262876
PPP2R5A	0.181582	PER3	0.208349
PPP2R5B	0.238906	PFTK1	0.405877
PRB3	0.0927431	PGM1	0.515609
PRB4	0.0495277	PHACTR1	0.294347
PRCC	0.399147	PHC2	0.349995
PRDM10	0.0991129	PHF1	0.297249
PRDX1	0.321062	PHF20	0.2659
PRDX6	0.278238	PHF20L1	0.276236
PRKACA	0.163323	PHLDA2	0.381946
PRKACB	0.158339	PHLDA3	0.234787
PRKAR1B	0.0851849	PHLDB1	0.17782
PRKAR2B	0.374102	PHOX2A	-0.0144123
PRKCDBP	0.333535	PI3	0.210374
PRKCH	0.189712	PIAS3	0.354802
PROCR	0.0556086	PIGC	0.517238
PROS1	-0.195969	PIGK	0.494815
PRPF39	0.320203	PIGO	0.333432
PRSS22	0.104669	PIGP	0.626076
PRSS3	0.00473292	PIK3C2B	0.223623
PSAT1	0.0492525	PIK3CD	0.194683
PSCD1	0.143894	PIK3R2	0.244821
PSEN2	0.284938	PILRB	0.0396523
PSMA2	0.38871	PINK1	0.290378
PSMA6	0.517292	PIP5K1A	0.295014
PSMA7	0.339154	PITPNM1	0.2945
PSMB8	0.306177	PKNOX1	0.265742
PSMB9	-0.0167928	PLAGL2	0.306943
PSMC2	0.268977	PLAT	-0.00704831
PSMC3	0.393978	PLAU	0.469375
PSMD1	0.330401	PLAUR	0.145969
PSMD14	0.272602	PLCB1	0.271662
PSMD7	0.429923	PLCB2	0.0537656
PTCRA	0.00524518	PLCB4	0.435752
PTGES	0.0389227	PLCG1	0.295935
PTGIS	0.102359	PLCG2	0.703317
PTMS	0.191456	PLCL2	0.0975634
PTN	0.112831	PLD2	0.310884
PTP4A2	0.429209	PLEK2	0.473593
PTPN12	0.244776	PLEKHA9	0.235329
PTPN6	0.265638	PLEKHB2	0.297503
PTPRCAP	0.0151016	PLEKHF1	0.278902
PTPRF	0.320582	PLEKHG3	0.153141
PTRF	0.201826	PLEKHM1	0.100655
PXMP4	0.0434418	PLEKHO1	0.151736
PYCR1	0.249159	PLEKHQ1	0.297066
R3HDM1	0.205905	PLK1	0.161009
RAB13	0.23086	PLK2	0.612196
RAB17	0.26892	PLK3	0.0676413
RAB31	0.074661	PLOD3	0.316592
RAB33B	0.339861	PLSCR1	0.26765
RAB35	0.189654	PLSCR4	0.237964
RAB3A	0.173601	PLTP	0.355602
RAB3GAP2	0.409796	PLVAP	-0.00709004
RAB3IL1	0.0851725	PMAIP1	0.418501
RAB6B	0.102107	PMF1	0.356785
RABAC1	0.6999	PMM1	0.466986
RABGAP1L	0.213189	PMS2	0.134482
RABIF	0.243965	PMS2L3	0.184405
RABL5	0.214127	PMVK	0.464465
RAD54B	0.101844	PNN	0.396696
RAG1AP1	0.170687	PNOC	0.260415
RAI14	0.322734	PNPLA2	0.194861
RALGDS	0.484197	POFUT1	0.231043
RAMP1	0.0733879	POLH	0.252722
RAPGEF5	0.321619	POLQ	0.264359
RARA	0.155047	POLR2A	0.0861374
RARG	0.233734	POLR3C	0.181942
RARRES1	0.53198	POMP	0.496373
RARRES3	0.0421368	POMT2	0.162839
RASAL1	0.243589	PON2	0.186512
RASSF2	0.2012	POU2F1	0.359737
RBBP5	0.284506	PPAP2A	0.384663
RBM12	0.16409	PPARD	0.181092
RBM12B	0.096456	PPFIBP1	0.206077
RBM14	0.0253066	PPIA	0.297617
RBM15	0.0722304	PPIC	0.458309
RBM23	0.338313	PPP1CB	0.189776
RBM8A	0.196687	PPP1R10	0.146553
RBM9	0.212078	PPP1R11	0.486192
RCE1	0.16809	PPP1R16B	0.13674
RCP9	0.22829	PPP1R3C	0.170747
RDH5	0.107442	PPP2R3A	0.366661
RECQL4	0.237711	PPP2R5A	0.181582
REEP2	0.0916964	PPP2R5B	0.238906
REL	0.197808	PRAME	0.404484
RELB	0.180383	PRB3	0.0927431
REM1	0.00342595	PRB4	0.0495277
RERE	0.261855	PRCC	0.399147
REXO4	0.434966	PRDM10	0.0991129
RFX5	0.243757	PRDX1	0.321062
RGL1	0.103022	PRDX6	0.278238
RGS16	0.0574713	PRKACA	0.163323
RGS19	0.184055	PRKACB	0.158339
RGS2	0.00741688	PRKAR1B	0.0851849
RGS3	0.314366	PRKAR2B	0.374102
RHBDF2	0.0965547	PRKCDBP	0.333535
RHOA	0.329147	PRKCH	0.189712
RHOBTB3	0.304322	PRNP	0.318229
RHOD	0.378719	PROCR	0.0556086
RHOF	0.204704	PROS1	-0.195969
RICS	0.323103	PRPF3	0.287823
RIMS2	0.0120678	PRPF39	0.320203
RIPK5	0.13657	PRSS16	0.266261
RIT1	0.294186	PRSS22	0.104669
RNASE1	0.0663829	PRSS23	0.419943
RNASE6	0.172237	PRUNE2	0.450248
RNASEL	0.00838078	PSAT1	0.0492525
RNASET2	0.387837	PSCD1	0.143894
RNF122	0.210886	PSEN2	0.284938
RNF24	0.222281	PSMA2	0.38871
RNF6	0.174519	PSMA6	0.517292
ROBO3	0.192354	PSMA7	0.339154
ROR1	0.225401	PSMB8	0.306177
RPL10A	0.118632	PSMC2	0.268977
RPL10L	0.0242888	PSMC3	0.393978
RPL12	0.037194	PSMC6	0.611513
RPL13	0.337281	PSMD1	0.330401
RPL18A	0.186284	PSMD14	0.272602
RPL21	0.269967	PSMD4	0.257262
RPL23	0.235425	PSME2	0.328845
RPL24	0.194542	PTCD1	0.254816
RPL27	0.0941965	PTCRA	0.00524518
RPL30	0.200637	PTGES3	0.448157
RPL37	0.157995	PTGIS	0.102359
RPL38	0.188608	PTMA	0.268416
RPL8	0.231346	PTMS	0.191456
RPL9	0.288454	PTP4A2	0.429209
RPLP0	0.274162	PTPN1	0.285367
RPS10	0.233344	PTPN12	0.244776
RPS11	0.147954	PTPN6	0.265638
RPS15A	0.221185	PTPRF	0.320582
RPS19	0.259128	PTPRG	0.365711
RPS20	0.18906	PTRF	0.201826
RPS21	0.239577	PTTG1	0.406147
RPS27	0.0673514	PXN	0.273563
RPS27A	0.267488	PYCR1	0.249159
RPS3A	0.22698	R3HDM1	0.205905
RPS6KA4	0.237563	RAB13	0.23086
RPS6KC1	0.52548	RAB17	0.26892
RPS9	0.259357	RAB25	0.898961
RRBP1	0.234057	RAB31	0.074661
RRN3	0.339584	RAB33B	0.339861
RRP12	0.164889	RAB35	0.189654
RSAD2	0.276994	RAB3A	0.173601
RTDR1	0.131287	RAB3GAP2	0.409796
RTN2	0.0802509	RAB3IL1	0.0851725
RTP4	0.00123824	RAB4B	0.37012
RUFY3	0.313023	RABAC1	0.6999
S100A1	0.00802839	RABEP2	0.256345
S100A10	0.146273	RABGAP1L	0.213189
S100A11	0.130767	RABIF	0.243965
S100A2	-0.0546288	RABL5	0.214127
S100A4	-0.0134938	RACGAP1	0.575822
S100A8	-0.524803	RAD54B	0.101844
S100PBP	0.344737	RAG1AP1	0.170687
SAFB	0.170427	RAI14	0.322734
SAMD9	-0.0428662	RALGDS	0.484197
SAP30BP	0.432427	RANBP17	0.252516
SATB1	-0.0317057	RAPGEF3	0.330736
SCAMP3	0.306598	RAPGEF5	0.321619
SCAMP5	0.122198	RAPGEFL1	0.403145
SCAND1	0.274422	RARA	0.155047
SCARA3	0.384703	RARG	0.233734
SCARB1	0.187067	RARRES1	0.53198
SCD	0.197762	RASA2	0.28201
SCG5	-0.241268	RASAL1	0.243589
SCIN	0.0446478	RASSF1	0.314101
SCMH1	0.380773	RASSF2	0.2012
SCNN1A	0.105791	RBBP5	0.284506
SCPEP1	0.460817	RBM12	0.16409
SCYL3	0.387361	RBM12B	0.096456
SDC2	0.212581	RBM14	0.0253066
SDC4	0.213619	RBM15	0.0722304
SDCBP	0.258825	RBM19	0.286263
SDCCAG8	0.187478	RBM23	0.338313
SDHB	0.177535	RBM39	0.25584
SEC14L1	0.301085	RBM8A	0.196687
SEC22B	-0.023712	RBM9	0.212078
SECISBP2	0.380284	RCE1	0.16809
SECTM1	-0.00713961	RCP9	0.22829
SELPLG	0.0159846	RDH5	0.107442
SEMA4A	-0.102062	RECQL4	0.237711
SEMA5A	0.00272118	REEP2	0.0916964
SERINC3	0.287078	REL	0.197808
SERPINA5	0.0868918	RELB	0.180383
SERPINB1	0.113151	REM1	0.00342595
SERPINB6	0.0957932	RERE	0.261855
SERPINB9	0.220006	REST	0.463668
SETX	0.411419	REXO4	0.434966
SFPQ	0.00444727	RFTN1	0.468594
SFRS1	0.183668	RFX5	0.243757
SFRS14	0.241277	RGL1	0.103022
SFRS2	0.147843	RGS16	0.0574713
SFRS3	0.21344	RGS19	0.184055
SFRS6	0.244487	RGS2	0.00741688
SFT2D2	0.180623	RGS3	0.314366
SFXN3	0.329976	RHBDF2	0.0965547
SGK2	-0.025636	RHOA	0.329147
SH2B3	0.141467	RHOBTB3	0.304322
SH2D2A	0.231562	RHOD	0.378719
SH2D4A	0.297107	RHOF	0.204704
SHB	0.378137	RICS	0.323103
SHC1	0.151718	RIPK1	0.274813
SIGLEC1	0.00924259	RIPK5	0.13657
SIPA1L3	0.246699	RIT1	0.294186
SIRPA	0.0592559	RNASE1	0.0663829
SIT1	0.0543329	RNASE6	0.172237
SKIP	0.287429	RNASET2	0.387837
SKIV2L	0.367166	RNF122	0.210886
SKP2	0.246353	RNF24	0.222281
SLA	0.0600007	RNF6	0.174519
SLAMF7	-0.200408	ROBO3	0.192354
SLC12A8	0.0992946	ROR1	0.225401
SLC15A3	0.452763	RPL10A	0.118632
SLC16A1	0.134547	RPL10L	0.0242888
SLC16A3	0.117915	RPL12	0.037194
SLC16A5	0.0538033	RPL13	0.337281
SLC1A3	0.367662	RPL18A	0.186284
SLC20A1	0.360991	RPL21	0.269967
SLC22A18	0.424778	RPL23	0.235425
SLC25A17	0.111264	RPL24	0.194542
SLC25A23	0.400748	RPL30	0.200637
SLC25A28	0.398606	RPL37	0.157995
SLC25A44	0.212341	RPL38	0.188608
SLC27A5	0.353523	RPL7A	0.261952
SLC29A1	0.330401	RPL8	0.231346
SLC29A2	0.343345	RPL9	0.288454
SLC2A10	0.486449	RPLP0	0.274162
SLC30A3	0.263298	RPS10	0.233344
SLC33A1	0.248906	RPS11	0.147954
SLC35C1	0.265922	RPS15A	0.221185
SLC35C2	0.367752	RPS16	0.258161
SLC36A1	0.111361	RPS19	0.259128
SLC39A1	0.141502	RPS2	0.253611
SLC39A14	0.52467	RPS20	0.18906
SLC39A8	0.298249	RPS21	0.239577
SLC41A3	0.338318	RPS23	0.281559
SLC43A3	0.440434	RPS27	0.0673514
SLC44A4	0.212832	RPS27A	0.267488
SLC4A7	0.230596	RPS29	0.345845
SLC7A8	0.0976257	RPS3A	0.22698
SLC9A1	0.300447	RPS5	0.441036
SLC9A3R1	0.351588	RPS6	0.290327
SLCO2A1	0.095127	RPS6KA4	0.237563
SLCO4A1	0.0592503	RPS6KC1	0.52548
SLIT3	0.290422	RPS7	0.294615
SLPI	0.0752199	RPS8	0.27145
SMAD6	0.184797	RPS9	0.259357
SMARCD3	0.393479	RRBP1	0.234057
SMC5	0.637754	RRN3	0.339584
SMG5	0.199226	RRP12	0.164889
SMOX	0.0760139	RSAD2	0.276994
SMPD2	0.13611	RSU1	0.268612
SMURF1	0.0420492	RTDR1	0.131287
SNCA	0.551893	RTN2	0.0802509
SNCAIP	-0.00438019	RUFY3	0.313023
SNCG	0.239606	RXRB	0.291231
SNF1LK	0.0929208	S100A10	0.146273
SNN	0.289239	S100A11	0.130767
SNPH	0.0341327	S100A8	-0.524803
SNTA1	0.148591	S100PBP	0.344737
SNTB2	0.241479	SAFB	0.170427
SNX11	0.408335	SAMD9	-0.0428662
SORBS3	0.242942	SAP30BP	0.432427
SOX10	0.0472748	SCAMP3	0.306598
SP100	0.306072	SCAMP5	0.122198
SP110	0.325184	SCAND1	0.274422
SPAG4	0.0593073	SCARA3	0.384703
SPARC	-0.0359823	SCARB1	0.187067
SPARCL1	0.135202	SCD	0.197762
SPDEF	0.244838	SCMH1	0.380773
SPHK2	0.257067	SCNN1A	0.105791
SPIN1	0.668067	SCPEP1	0.460817
SPN	-0.00394417	SCYL3	0.387361
SPOCK2	0.273165	SDC2	0.212581
SPON1	0.227879	SDC4	0.213619
SPRY4	0.222664	SDCBP	0.258825
SPSB1	0.208477	SDCCAG8	0.187478
SPTBN1	0.234415	SDHB	0.177535
SREBF1	0.412452	SEC14L1	0.301085
SRF	0.17751	SEC22B	-0.023712
SRGAP3	0.333599	SEC24D	0.278417
SRP72	0.650375	SECISBP2	0.380284
SRP9	0.253569	SEMA5A	0.00272118
SRPRB	0.190911	SERINC3	0.287078
SSFA2	0.515098	SERPINA5	0.0868918
SSR2	0.294973	SERPINB1	0.113151
ST3GAL5	0.11891	SERPINB6	0.0957932
ST6GAL1	0.149761	SERPINB9	0.220006
ST6GALNAC2	0.178275	SF3B4	0.252109
ST6GALNAC5	0.584936	SF4	0.289655
ST7L	0.157952	SFN	0.579972
STAB1	0.199854	SFRS1	0.183668
STAG3	0.226064	SFRS14	0.241277
STARD13	0.263125	SFRS16	0.259432
STAT3	0.408265	SFRS2	0.147843
STEAP3	0.150854	SFRS3	0.21344
STK11	0.269143	SFRS4	0.604455
STK17A	0.207339	SFRS6	0.244487
STK39	0.224482	SFRS7	0.298294
STMN1	0.401457	SFT2D2	0.180623
STOM	0.344442	SFXN3	0.329976
STRA6	0.21047	SGK2	-0.025636
STT3A	0.481339	SH2B3	0.141467
STXBP6	0.813041	SH2D2A	0.231562
SULF1	0.411686	SH2D4A	0.297107
SULT4A1	0.278133	SH3BP2	0.261114
SUMO2	0.203431	SH3GL1	0.619184
SUMO4	-0.014667	SHB	0.378137
SUSD4	0.336347	SHC1	0.151718
SYDE1	0.046196	SHMT1	0.367745
SYNJ2	0.197341	SIGLEC1	0.00924259
SYNPO	0.418232	SIPA1L3	0.246699
SYT17	0.440227	SIRPA	0.0592559
TACC1	0.0713129	SIRT2	0.296095
TACSTD2	0.202429	SIT1	0.0543329
TAF4	0.246857	SKAP1	0.392004
TAGLN	0.372185	SKIP	0.287429
TAGLN2	0.10805	SKIV2L	0.367166
TANK	0.377974	SKP2	0.246353
TAOK3	0.324037	SLA	0.0600007
TAP1	0.317772	SLAMF7	-0.200408
TAPBP	0.123059	SLC12A8	0.0992946
TBC1D8	0.274213	SLC15A3	0.452763
TBKBP1	0.0340771	SLC16A1	0.134547
TBL1XR1	0.339354	SLC16A3	0.117915
TBRG4	0.334503	SLC1A3	0.367662
TBX19	0.22535	SLC1A4	0.384351
TCP11L1	0.14007	SLC20A1	0.360991
TDP1	0.496383	SLC20A2	0.257453
TENC1	0.266794	SLC22A17	0.257684
TESK2	0.402042	SLC22A18	0.424778
TEX264	0.654537	SLC24A1	0.28702
TFAP2A	0.0948393	SLC25A12	0.44236
TFAP2C	0.229718	SLC25A23	0.400748
TFAP4	0.116746	SLC25A28	0.398606
TFEB	0.0137489	SLC25A44	0.212341
TFPI2	-0.177585	SLC27A3	0.498767
TGFB1I1	0.205863	SLC27A5	0.353523
TGFB3	0.262301	SLC29A1	0.330401
TGFBI	0.033364	SLC29A2	0.343345
TGFBR2	0.251327	SLC2A10	0.486449
TGM2	-0.0263846	SLC2A4RG	0.307397
TGOLN2	0.387011	SLC30A3	0.263298
THBS1	0.192643	SLC33A1	0.248906
THBS2	-0.0562615	SLC35C1	0.265922
THBS4	0.0195343	SLC35C2	0.367752
THRA	0.20989	SLC36A1	0.111361
THRB	0.242771	SLC39A1	0.141502
THTPA	0.246792	SLC39A14	0.52467
THY1	0.311852	SLC39A8	0.298249
TIMM17A	0.311848	SLC41A3	0.338318
TIMP2	0.152835	SLC43A3	0.440434
TIMP3	0.38642	SLC44A4	0.212832
TINAGL1	0.115843	SLC4A7	0.230596
TJP2	0.950731	SLC7A8	0.0976257
TLE3	0.219353	SLC9A1	0.300447
TMC6	0.212541	SLC9A3R1	0.351588
TMEFF1	0.123678	SLCO2A1	0.095127
TMEM132A	0.305608	SLCO4A1	0.0592503
TMEM140	0.0836548	SLIT3	0.290422
TMEM158	0.640249	SMAD6	0.184797
TMEM159	0.280659	SMARCA2	0.293435
TMEM176A	-0.0655619	SMARCD3	0.393479
TMEM2	0.397325	SMC5	0.637754
TMEM30B	0.413192	SMG5	0.199226
TMEM45A	0.166232	SMO	0.283936
TMEM53	0.249339	SMOX	0.0760139
TMEM63A	0.168616	SMPD2	0.13611
TMEPAI	0.169075	SMURF1	0.0420492
TMPRSS6	-0.0177653	SNCA	0.551893
TNC	0.702996	SNCG	0.239606
TNFRSF1A	0.249902	SNF1LK	0.0929208
TNFRSF21	0.224194	SNN	0.289239
TNNT1	0.0697268	SNPH	0.0341327
TNS1	0.32728	SNRPA	0.283758
TNXB	0.0110308	SNTA1	0.148591
TOE1	0.415688	SNTB2	0.241479
TOLLIP	0.327327	SORBS3	0.242942
TOMM34	0.370218	SOS2	0.259194
TP53I11	0.252327	SOX10	0.0472748
TPCN1	0.46466	SOX4	0.294056
TPM2	0.0462807	SP100	0.306072
TPST1	0.104461	SP110	0.325184
TPT1	0.145937	SPDEF	0.244838
TRAPPC2L	0.639031	SPG20	0.29085
TRIM25	0.075878	SPHK2	0.257067
TRIM29	0.256585	SPIN1	0.668067
TRIOBP	0.422209	SPOCK2	0.273165
TRMT5	0.238443	SPON1	0.227879
TRPC4AP	0.224104	SPR	0.344262
TRPM2	0.225756	SPRED2	0.294768
TRPM4	0.252909	SPRY4	0.222664
TSC1	0.399127	SPSB1	0.208477
TSC22D2	0.122433	SPTBN1	0.234415
TSN	0.477152	SRBD1	0.296482
TSPAN15	0.257959	SREBF1	0.412452
TSPAN5	0.0796623	SRF	0.17751
TSPAN9	0.141581	SRGAP3	0.333599
TSPYL5	0.144403	SRP72	0.650375
TSR1	0.300117	SRP9	0.253569
TTF1	0.489711	SSFA2	0.515098
TTF2	0.243963	SSR2	0.294973
TTLL5	0.288206	SSR3	0.380926
TUBD1	0.289833	ST3GAL2	0.250185
TUBGCP2	0.139607	ST3GAL4	0.299165
TXNDC1	0.510382	ST3GAL5	0.11891
TYROBP	0.0281535	ST6GAL1	0.149761
U2AF2	0.232664	ST6GALNAC2	0.178275
UBB	-0.226678	ST6GALNAC5	0.584936
UBC	0.144864	ST7L	0.157952
UBD	0.161284	STAB1	0.199854
UBE2Q1	0.350851	STAG3	0.226064
UBTF	0.131702	STARD13	0.263125
UNC93B1	0.250535	STAT3	0.408265
UPK3B	0.400422	STAT5A	0.279078
USP13	0.230916	STAT6	0.435164
USP6	0.208889	STEAP3	0.150854
UTP14C	0.628506	STK10	0.294239
UTP18	0.338299	STK11	0.269143
VAMP3	0.480384	STK17A	0.207339
VAMP4	0.332623	STK39	0.224482
VAMP5	-0.0991262	STMN1	0.401457
VAMP8	0.181202	STOM	0.344442
VANGL1	0.241948	STRA6	0.21047
VAT1	0.200507	STT3A	0.481339
VCP	0.600785	STX2	0.318997
VDR	-0.0181431	STXBP6	0.813041
VEGFA	0.18858	SULF1	0.411686
VEGFC	-0.0278267	SULT4A1	0.278133
VILL	0.375085	SUMO2	0.203431
VPS13A	0.381984	SUSD4	0.336347
VPS24	0.349059	SYDE1	0.046196
VWF	-0.0122539	SYNGR2	0.443383
WBP2	0.290292	SYNJ2	0.197341
WDR23	0.38376	SYNPO	0.418232
WDR5B	0.414365	SYT17	0.440227
WDR62	0.139108	TACC1	0.0713129
WFDC2	0.298418	TACSTD2	0.202429
WIPF1	-0.083951	TAF4	0.246857
WISP3	0.388095	TAF5L	0.256131
WNT16	0.0504148	TAGLN	0.372185
WNT5A	0.088901	TAGLN2	0.10805
WT1	0.328183	TANK	0.377974
WWP2	0.11248	TAOK3	0.324037
XKR8	0.139695	TAP1	0.317772
XPO4	0.21538	TAPBPL	0.306678
YARS	0.384815	TARDBP	0.272574
YBX2	0.246438	TAX1BP1	0.626503
YIPF1	0.368562	TBC1D4	0.269322
YIPF4	0.323891	TBC1D8	0.274213
YTHDC1	0.21336	TBKBP1	0.0340771
ZAK	0.057672	TBL1XR1	0.339354
ZBTB40	0.186313	TBRG4	0.334503
ZC3H11A	0.410329	TBX19	0.22535
ZC3H12A	0.0665825	TCF7	0.330081
ZC3HAV1	0.20982	TCP11L1	0.14007
ZCWPW1	0.217511	TDP1	0.496383
ZDHHC18	0.263382	TENC1	0.266794
ZFP36L1	0.274079	TESK2	0.402042
ZFP36L2	0.255364	TEX264	0.654537
ZFR	0.122081	TFAP2A	0.0948393
ZFYVE9	0.138275	TFAP2C	0.229718
ZHX2	0.24059	TFAP4	0.116746
ZHX3	0.0641409	TFEB	0.0137489
ZMAT3	0.177614	TFG	0.250177
ZNF124	0.386171	TGFB1I1	0.205863
ZNF174	0.184984	TGFB3	0.262301
ZNF200	0.322632	TGFBR2	0.251327
ZNF273	0.2679	TGM2	-0.0263846
ZNF274	0.370099	TGOLN2	0.387011
ZNF335	0.0932785	THBS1	0.192643
ZNF33B	0.536916	THBS2	-0.0562615
ZNF364	0.257391	THBS4	0.0195343
ZNF384	0.207156	THRA	0.20989
ZNF423	0.71435	THRB	0.242771
ZNF44	0.227761	THTPA	0.246792
ZNF467	0.158988	THY1	0.311852
ZNF552	0.295247	TIMM17A	0.311848
ZNF639	0.171597	TIMP3	0.38642
ZNF767	0.293873	TINAGL1	0.115843
ZNRF4	0.0231237	TIPARP	0.298307
ZZEF1	0.258937	TJP2	0.950731
		TLE3	0.219353
		TM4SF1	0.303876
		TMC6	0.212541
		TMCO1	0.311882
		TMEM110	0.342906
		TMEM132A	0.305608
		TMEM140	0.0836548
		TMEM149	0.254061
		TMEM158	0.640249
		TMEM159	0.280659
		TMEM2	0.397325
		TMEM30B	0.413192
		TMEM39B	0.571982
		TMEM53	0.249339
		TMEM63A	0.168616
		TMEPAI	0.169075
		TMPRSS6	-0.0177653
		TMSB10	0.26345
		TNC	0.702996
		TNFRSF14	0.314833
		TNFRSF1A	0.249902
		TNFRSF21	0.224194
		TNS1	0.32728
		TNXB	0.0110308
		TOE1	0.415688
		TOLLIP	0.327327
		TOMM34	0.370218
		TP53BP2	0.576548
		TP53I11	0.252327
		TPCN1	0.46466
		TPI1	0.267648
		TPMT	0.272756
		TPST1	0.104461
		TPT1	0.145937
		TRAF6	0.343447
		TRAPPC2L	0.639031
		TRAPPC6A	0.481678
		TRIM25	0.075878
		TRIM29	0.256585
		TRIM45	0.262735
		TRIO	0.272151
		TRIOBP	0.422209
		TRMT5	0.238443
		TRPC4AP	0.224104
		TRPM2	0.225756
		TRPM4	0.252909
		TRRAP	0.305929
		TSC1	0.399127
		TSC22D2	0.122433
		TSEN2	0.48585
		TSN	0.477152
		TSPAN15	0.257959
		TSPAN9	0.141581
		TSPYL5	0.144403
		TSR1	0.300117
		TTC26	0.263115
		TTC27	0.475722
		TTF1	0.489711
		TTF2	0.243963
		TTLL5	0.288206
		TUBB2A	0.345359
		TUBD1	0.289833
		TUBGCP2	0.139607
		TXNDC1	0.510382
		TYROBP	0.0281535
		U2AF2	0.232664
		UBA52	0.296378
		UBB	-0.226678
		UBC	0.144864
		UBE2Q1	0.350851
		UBTF	0.131702
		UGCGL1	0.362746
		UMPS	0.282809
		UNC93B1	0.250535
		UPK3B	0.400422
		USP13	0.230916
		USP36	0.436685
		USP6	0.208889
		UTP14C	0.628506
		UTP18	0.338299
		VAMP3	0.480384
		VAMP4	0.332623
		VAMP8	0.181202
		VANGL1	0.241948
		VARS	0.28555
		VCAM1	0.611404
		VCP	0.600785
		VDR	-0.0181431
		VEGFA	0.18858
		VILL	0.375085
		VLDLR	0.54019
		VPS13A	0.381984
		VPS24	0.349059
		VPS41	0.434069
		WBP2	0.290292
		WDR23	0.38376
		WDR26	0.475493
		WDR42A	0.39183
		WDR5B	0.414365
		WDR62	0.139108
		WDR77	0.343477
		WFDC2	0.298418
		WIPF1	-0.083951
		WNT16	0.0504148
		WNT5A	0.088901
		WT1	0.328183
		WWC2	0.469818
		WWP2	0.11248
		XKR8	0.139695
		XPO4	0.21538
		YARS	0.384815
		YBX2	0.246438
		YIPF1	0.368562
		YIPF4	0.323891
		YTHDC1	0.21336
		YY1AP1	0.454881
		ZBTB17	0.2723
		ZBTB40	0.186313
		ZC3H11A	0.410329
		ZC3H12A	0.0665825
		ZC3HAV1	0.20982
		ZCWPW1	0.217511
		ZDHHC18	0.263382
		ZDHHC24	0.336027
		ZER1	0.299466
		ZFP161	0.290283
		ZFP36	0.344432
		ZFP36L1	0.274079
		ZFP36L2	0.255364
		ZFP64	0.262303
		ZFR	0.122081
		ZFYVE9	0.138275
		ZHX2	0.24059
		ZHX3	0.0641409
		ZMAT3	0.177614
		ZNF124	0.386171
		ZNF174	0.184984
		ZNF200	0.322632
		ZNF226	0.310113
		ZNF273	0.2679
		ZNF274	0.370099
		ZNF335	0.0932785
		ZNF33B	0.536916
		ZNF364	0.257391
		ZNF384	0.207156
		ZNF423	0.71435
		ZNF44	0.227761
		ZNF446	0.289081
		ZNF467	0.158988
		ZNF552	0.295247
		ZNF639	0.171597
		ZNF767	0.293873
		ZZEF1	0.258937
		ZZZ3	0.457592

## Sheet: Table S2
Table S2 1,170 DSGs and 1,215 DRGs collected by DSS
DSS[-0.1,0.2](1,215)		DSS[0.7,1.0](1,170)
dosage resistant genes	DSS	dosage sensitive genes	DSS
A4GALT	0.159977	AARS	0.84949
ABAT	0.215684	ABHD14A	0.719819
ABCA5	0.367189	ABHD5	0.808776
ABCG1	0.118745	ABL1	0.818061
ABHD3	0.110115	ACAA2	0.710866
ABLIM1	0.568841	ACAT1	0.989465
ABTB2	0.0190594	ACD	0.984426
ACADS	0.187365	ACLY	0.720535
ACBD3	0.321592	ACSL1	0.940635
ACBD4	-0.0345701	ACTN1	0.975131
ACOX1	0.355817	ACTR1A	0.744283
ACSL5	0.301859	ACTR6	0.864154
ACTA2	0.116911	ADAT1	0.971135
ACTG1	0.136332	ADD3	0.753008
ADAM28	0.226727	ADH5	0.897499
ADAMTS1	0.364867	ADI1	0.747229
ADAMTS13	-0.0314901	ADK	0.72447
ADAR	0.292475	ADSL	0.748616
ADRBK1	0.13894	AES	0.873937
AEBP1	0.0883709	AFG3L2	0.763245
AFF1	0.199167	AGA	0.900088
AGTRL1	-0.010475	AGPAT2	0.767029
AIF1	-0.132889	AGPAT5	0.911113
AIM1	0.608474	AGPAT7	0.771496
AIM1L	0.0607128	AHDC1	0.784366
AKAP12	0.0169119	AK1	0.917936
ALDH3A1	0.0981891	AKAP11	0.713143
ALDH3B1	0.00711331	AKR7A2	0.735282
ALDH4A1	0.20879	AKT1	0.813397
ALDOC	0.165982	ALDH6A1	0.788683
ALOX5AP	-0.0577417	ALG8	0.73978
AMIGO2	0.164915	ALG9	0.837019
AMPD3	0.177741	AMD1	0.729479
ANAPC13	0.340753	AMT	0.784989
ANG	0.146965	AMZ2	0.772299
ANGPTL2	0.176033	ANAPC5	0.76092
ANKRD6	0.393483	ANKMY2	0.962959
ANP32E	0.163957	ANKRA2	0.747441
ANXA4	0.55107	ANKRD11	0.797902
ANXA6	-0.00975058	ANKRD15	0.783592
AP3B1	0.450765	ANKRD49	0.724773
APBB1	0.158655	ANXA1	1.18642
APH1B	-0.0499451	ANXA7	0.73638
APOA1	0.472278	AP2A2	0.747316
APOBEC3B	-0.147249	AP3S1	0.72007
APOBEC3C	0.0415836	APPBP1	0.930708
APOC1	-0.0533802	APTX	0.837137
APOC2	-0.155953	AQP3	0.900962
APOE	0.19729	ARFGAP3	1.00318
APOM	0.147356	ARFIP2	0.986153
APP	0.166655	ARHGAP17	0.783216
AQP1	0.0041567	ARHGAP5	0.755064
ARHGAP1	0.219096	ARHGEF3	0.747623
ARHGAP10	0.0566531	ARID5B	0.975317
ARHGAP25	0.124959	ARL2	0.85965
ARHGDIB	-0.200906	ARL4C	1.01849
ARHGEF1	0.1897	ARPC5L	0.856511
ARHGEF10L	0.211252	ARPP-19	0.791375
ARHGEF11	0.122031	ASCC1	0.704309
ARHGEF2	0.182566	ASCC2	0.851605
ARID3B	0.217281	ASCC3	0.971973
ARID5A	0.0964895	ATF1	0.743213
ARL4D	-0.0766376	ATF4	0.854564
ARMC7	0.0806934	ATG5	0.798952
ARNT	0.172446	ATP2A2	0.721702
ARNTL	0.2655	ATP5D	0.796384
ARPC5	0.193477	ATP5G2	0.720312
ARS2	0.0548802	ATP6V1B2	0.835889
ARVCF	0.208801	ATP6V1D	0.895841
ASH1L	0.184056	ATP6V1E1	0.966313
ASPH	0.176864	ATPBD1B	0.718916
ASPHD1	0.0453632	ATPBD1C	0.856426
ATAD3A	0.287112	ATXN2	0.734907
ATAD4	0.411078	AURKB	0.796873
ATF7IP2	0.367296	AUTS2	0.870238
ATP1B1	0.323219	AVEN	0.717944
ATP5H	0.29025	BACE2	0.815619
ATP6V1B1	0.0365113	BAG5	0.729277
ATP8B1	0.0594231	BAZ2B	0.944282
ATP8B2	0.0743249	BBS10	0.722992
AVPI1	0.430805	BCAT2	0.898279
B2M	0.166913	BCKDK	0.725055
B3GAT3	0.323691	BCL2L13	0.808822
B3GNT2	0.26778	BCR	0.913879
B4GALT2	0.199001	BHLHB2	0.835683
BACH1	0.222411	BIN3	0.808489
BAIAP2	0.2185	BLM	0.751422
BAK1	0.147015	BLOC1S1	0.713549
BASP1	0.0152233	BMPR2	0.867965
BBC3	0.0758982	BNIP3	0.872101
BBS5	0.100132	BNIP3L	0.804764
BCAP29	0.133478	BSCL2	0.835674
BCCIP	0.275522	BSPRY	0.979881
BCL10	0.39725	BTAF1	0.954725
BCL2L1	0.181932	BTG1	0.792069
BCL2L10	0.00912855	BXDC5	0.721288
BCL2L2	0.274007	BYSL	0.752807
BCL3	0.0630933	BZW2	0.762218
BCL6	-0.00858071	C10orf26	0.769318
BECN1	0.47386	C10orf38	0.722442
BET1L	0.161821	C10orf88	0.709143
BGLAP	0.174981	C11orf2	0.955311
BIRC3	0.301135	C11orf48	0.785904
BLVRA	0.188325	C11orf51	0.741038
BMP7	0.128906	C11orf57	0.770319
BNC2	0.186734	C11orf58	0.810479
BRMS1	0.364952	C11orf67	0.723843
BST2	0.142618	C12orf10	0.917046
BTG2	0.265998	C12orf29	0.748148
BUB1	0.208249	C12orf41	0.828431
C10orf10	0.25903	C12orf43	0.845875
C10orf110	-0.0166563	C12orf44	0.927248
C10orf116	-0.0264242	C13orf34	0.736325
C11orf24	0.158409	C14orf106	0.706587
C14orf143	0.17512	C14orf130	0.742429
C14orf166	0.554274	C14orf159	0.770573
C14orf94	0.247698	C15orf44	0.890264
C16orf45	0.343668	C16orf24	0.816938
C1D	0.455549	C16orf33	0.737702
C1orf106	0.59615	C16orf53	0.761943
C1orf109	0.487589	C16orf58	0.730285
C1orf113	0.0641389	C16orf61	0.860791
C1orf115	0.229707	C17orf48	0.838117
C1orf144	0.390122	C17orf81	0.971431
C1orf160	0.484987	C17orf85	0.810572
C1orf183	0.0503231	C18orf10	0.999062
C1orf54	0.140707	C19orf10	0.991852
C1orf66	0.0832267	C19orf28	0.7954
C1orf78	0.330697	C1orf25	0.736596
C1QB	-0.231131	C1orf38	0.889371
C1QTNF1	0.0576103	C1orf41	0.783009
C1QTNF3	0.0169638	C1orf63	0.862386
C1S	0.00597104	C1QBP	0.834127
C2	0.204754	C21orf25	0.962699
C20orf103	-0.00159661	C21orf59	0.807483
C20orf111	0.279024	C21orf91	0.969836
C20orf121	0.230115	C22orf9	0.80189
C20orf149	0.145033	C2orf33	0.790151
C20orf24	0.247018	C3orf14	0.817033
C20orf59	0.0704746	C3orf60	0.879564
C2orf18	0.218613	C4orf15	0.815163
C2orf25	0.46518	C4orf27	0.924917
C2orf27	-0.0423895	C4orf8	0.728871
C3	-0.204835	C5orf21	0.955812
C3orf28	0.248785	C5orf30	0.802724
C5AR1	0.0719405	C5orf5	0.801159
C5orf13	-0.0607922	C6orf120	0.716757
C5orf23	0.359928	C6orf66	0.907796
C7	0.0432674	C9orf16	0.808171
C7orf28A	0.140365	C9orf46	0.872778
C7orf43	0.163743	C9orf6	0.755791
C8orf4	0.000463203	C9orf82	0.807539
C9orf91	0.211393	CACNB3	0.813676
CA11	0.0865673	CALML4	0.906938
CA9	0.32662	CAMLG	0.835838
CACNA2D1	0.0127108	CAND1	0.819179
CACNG1	0.0634202	CAPN1	0.787794
CACNG4	0.190291	CARS	0.97162
CADPS2	-0.0799096	CASC3	0.79006
CALM2	0.223074	CASP6	0.960973
CALR	0.167781	CASP8AP2	0.92159
CAMK2N1	0.13505	CAST	0.789569
CANT1	0.395872	CAV1	1.05495
CARD10	0.191673	CBARA1	0.731957
CARD8	0.153951	CBFB	0.760185
CARD9	0.0588335	CBX5	0.701694
CASKIN2	0.138663	CCDC25	0.795371
CASP1	0.428974	CCDC28A	0.877185
CASP7	0.386859	CCDC44	0.774885
CASZ1	0.0849691	CCDC56	0.853679
CBX1	0.458906	CCDC6	0.921826
CCDC21	0.19765	CCNA2	0.763643
CCL22	0.0265468	CCNB2	0.871587
CCNA1	-0.011249	CCNG1	0.760284
CCNF	0.176281	CCNH	0.892404
CCNT2	0.211629	CCT2	0.901107
CCR1	0.185822	CCT4	0.704377
CCR5	0.0976409	CD164	0.81546
CCT3	0.308857	CD74	0.826309
CCT6B	0.184685	CDC20	0.711878
CD14	0.0573149	CDC23	0.713901
CD2	0.13552	CDC2L2	0.8149
CD200	0.210976	CDC37L1	0.707045
CD248	-0.0783391	CDC40	0.821114
CD302	0.0471121	CDC45L	0.706251
CD34	0.0123729	CDCA4	0.725693
CD3D	-0.119192	CDCP1	1.17268
CD4	-0.0942601	CDH2	0.762925
CD40	0.125521	CDH3	0.791375
CD46	0.296349	CDK4	0.818255
CD52	0.050667	CDK5RAP2	0.80919
CD55	0.196654	CDKN1C	0.826087
CD70	-0.0461555	CDKN2AIP	0.899089
CD82	0.0649012	CDKN3	0.713166
CD93	-0.160029	CEBPG	0.706668
CDC16	0.542909	CENPE	0.784842
CDC27	0.308653	CENTG2	0.961727
CDC2L5	0.130785	CEP192	0.756248
CDC42	0.249154	CEP76	0.764743
CDC42EP2	0.154559	CERK	0.722453
CDH11	0.106458	CES2	0.856218
CDH22	0.0559533	CETN3	0.938005
CDH5	0.0808964	CFDP1	0.91166
CDH6	0.190791	CGRRF1	0.766065
CDK3	0.118102	CHCHD8	0.731677
CDKN1A	0.26665	CHD9	0.775247
CDKN2C	0.125693	CHFR	0.743426
CDR2L	0.397845	CHMP1B	0.842126
CDX1	0.0766945	CHMP5	0.792738
CEBPB	0.208702	CHMP7	0.784552
CEBPD	0.10983	CHORDC1	0.811702
CENTD2	0.238587	CHUK	0.849993
CFB	0.0741433	CIB1	0.967681
CFD	0.262218	CINP	0.903325
CFH	0.106283	CKAP4	0.918917
CFI	0.298823	CKLF	0.82101
CHAF1A	0.336287	CKMT2	0.864081
CHD3	0.303006	CKS2	0.710243
CHEK1	0.345605	CLASP1	0.746223
CHI3L1	0.264065	CLASP2	0.809948
CHST2	0.18123	CLINT1	0.848003
CHST5	-0.00586266	CLK3	0.757413
CIDEB	-0.11714	CLP1	0.83924
CIDEC	0.120306	CLPP	0.831061
CILP	0.212594	CLPX	0.881098
CISH	0.212485	CLUAP1	0.726185
CLCN2	0.164735	CNN2	0.929233
CLDN1	0.194911	CNOT2	0.714399
CLDN16	0.355625	CNOT7	0.878292
CLDN5	0.0765524	COG4	0.717246
CLDND1	0.372434	COG5	0.846285
CLEC11A	0.0393003	COG7	0.888823
CLIC5	0.15108	COIL	0.794829
CLTA	0.530125	COL4A3BP	0.703513
CLU	0.501185	COL9A2	0.87536
CNN1	0.175268	COMMD4	0.912819
CNNM4	0.169443	COMMD8	0.948806
COL15A1	0.12798	COMT	0.820546
COL16A1	0.264157	COPS2	0.93527
COL1A1	-0.0237125	COPS3	0.774889
COL4A1	0.201545	COPS8	0.854972
COL6A1	-0.00858055	COQ3	0.889657
COL6A2	-0.102402	COQ4	0.732814
COL8A2	0.102823	CORO2A	0.985322
COLEC12	0.0864186	COX15	0.8376
COPZ2	0.0938628	COX4I1	0.764175
COTL1	0.0113691	CP110	0.889398
COX6A2	0.0725304	CRAT	0.843817
COX7A1	0.0435617	CREB3	0.741456
CP	-0.13875	CRK	0.703059
CPD	0.176917	CRNKL1	0.783035
CPNE7	0.0290136	CRTC3	0.9556
CPVL	0.687725	CRYAB	0.940713
CRABP2	0.0717021	CRYZ	0.9857
CRADD	0.170234	CRYZL1	0.738332
CREBBP	0.238931	CSK	0.845459
CRIP1	-0.0627107	CSNK1G3	0.858411
CRISPLD2	0.0695637	CST6	0.996971
CRKRS	0.312203	CSTB	0.714535
CRTC1	0.0903158	CTBP1	0.736805
CRYL1	0.314295	CTBP2	0.787973
CSF1	0.155702	CTCF	0.732832
CSF1R	0.161645	CTNND1	0.765447
CSPG5	0.407573	CTPS	0.805333
CSRP1	0.266701	CUL4A	0.814559
CSTF3	0.0316104	CUTC	0.762985
CTAGE5	0.229624	CXCL10	0.968924
CTGF	0.241448	CXXC1	0.883972
CTSA	0.334658	CYB5A	0.935505
CTSB	0.301555	CYB5R2	0.892412
CTSK	0.0141562	CYB5R3	0.860177
CTSS	-0.0124991	CYFIP1	0.960908
CTSZ	0.117629	DAAM1	0.798457
CUGBP1	0.196709	DALRD3	0.90731
CUGBP2	0.169562	DAZAP2	0.825442
CUTL1	0.164073	DCI	0.900849
CXCL2	0.134692	DCP1A	0.7713
CXCL9	0.149008	DCTD	0.850289
CYB5B	0.484295	DCTN1	0.71924
CYBA	0.288904	DCTN2	0.745805
DAB2	0.0302344	DCTN5	0.872503
DAPP1	0.157592	DCTN6	0.940264
DBI	-0.108316	DCUN1D2	0.722431
DBR1	0.173497	DCXR	0.861707
DCN	0.173003	DDHD2	0.771482
DDOST	0.416033	DDX1	0.764377
DDR2	-0.0869542	DDX10	0.805429
DDX31	0.270674	DDX19A	0.793889
DEFB1	0.49778	DDX21	0.894153
DHODH	0.143305	DDX23	0.794907
DHRS1	0.189043	DDX24	0.718242
DHRS7	0.274125	DDX41	0.735691
DHX8	0.448418	DDX50	0.887626
DNAJB4	0.228003	DDX58	1.26848
DNALI1	0.0228287	DEAF1	0.958945
DNM2	0.121335	DENND2D	0.773499
DNPEP	0.241631	DENR	0.884695
DNTTIP2	0.423829	DERL2	0.84106
DOK1	0.106306	DET1	0.855393
DOK5	-0.059454	DFFA	0.804748
DOM3Z	0.500609	DHFR	0.750565
DPM3	0.314407	DHX29	0.758989
DPYSL3	0.541244	DHX30	0.757033
DRAM	0.303018	DHX40	0.805793
DST	0.105351	DIABLO	0.824215
DTNB	0.101232	DIMT1L	0.717533
DUSP12	0.444835	DLAT	0.96292
DUSP2	0.221684	DLG5	0.930147
DYNC1I1	-0.0109128	DMXL1	0.929157
DYNLL1	0.191469	DNAJC10	0.70551
DYSF	0.0591474	DNAL4	0.906861
E2F1	0.188911	DNMT3A	0.758512
ECE1	0.12198	DOCK1	0.8145
ECM1	0.0107084	DONSON	0.97482
EDG4	0.283194	DPF2	0.707923
EDG7	0.233605	DPM2	0.96538
EEF1A1	0.0958776	DPP8	0.902726
EFEMP1	0.100071	DPYSL2	0.888919
EFNA1	0.191859	DRAP1	0.824852
EFNA3	0.35254	DRG1	0.743612
EGR2	0.326695	DSCR2	0.791285
EI24	0.598829	DUSP1	0.723106
EIF2C3	0.308862	DUT	0.740875
ELAVL1	0.424822	DVL2	0.953138
ELF3	-0.123691	DYNC1LI1	0.816144
ELSPBP1	-0.0189825	E2F6	0.882935
EML3	0.20459	ECD	0.969299
EMP3	0.202356	EEF2	0.721868
ENC1	0.111377	EFHA1	0.873781
ENG	0.144399	EFHC1	0.733943
ENPP4	0.42498	EFNB2	0.983625
ENTPD1	0.109245	EFTUD1	0.794954
ENTPD7	0.160332	EHF	0.73156
EPAS1	0.0786655	EIF2AK1	0.752683
EPHA2	0.234373	EIF2B2	0.706601
EPHX1	0.345532	EIF4E	0.94997
EPOR	0.192639	EIF4ENIF1	0.714419
ERN2	0.0712722	ELMO3	0.767574
ERO1L	0.385645	ELP3	0.871774
ESR1	0.0962291	EMID1	0.750991
ESRRA	0.316416	ENOSF1	0.887345
ETV4	0.124652	EP400	0.792427
ETV7	0.123224	EPB41L4B	1.28886
EVI5	0.229415	EPM2AIP1	0.75894
EXO1	0.314892	ERBB4	0.913741
EXOC7	0.408409	ERCC1	0.714484
EZH1	0.241225	ERP29	0.886544
F13A1	0.0536032	ESD	0.707243
F2R	0.11282	ESPL1	0.945922
F3	0.328247	ETFA	0.932979
FADS1	0.229208	EXOC1	0.945614
FADS2	0.310574	EXOSC7	0.928494
FAM125B	0.164042	EXOSC9	0.779187
FAM3C	0.349824	EXPH5	0.827492
FAM63A	0.222185	EXT2	0.722663
FASTKD3	0.415446	FAF1	0.757839
FBLN5	0.586799	FAM13A1	0.865804
FBN1	-0.143283	FAM26B	0.821141
FBXL7	0.166323	FAM62A	0.775985
FER	0.175195	FAM89B	0.883874
FEZ1	0.0823923	FAM98A	0.733693
FGF18	0.152693	FANCF	0.95295
FGL2	0.126022	FARP1	0.716846
FHL3	0.208611	FAT	1.09565
FILIP1L	-0.0679766	FBP1	0.71583
FKBP11	0.141803	FBXL4	0.80978
FKBP8	0.192614	FBXL5	0.92343
FLJ10986	0.227948	FBXO21	0.87721
FLJ20294	0.200645	FBXO3	0.83757
FLJ20309	0.123308	FBXO5	0.82809
FLJ21865	0.224629	FCMD	0.852721
FLJ22662	0.179133	FDFT1	0.720106
FLNC	0.160195	FDX1	0.896916
FLRT2	0.198742	FECH	0.762345
FN1	-0.0989931	FER1L3	0.822328
FNBP4	0.360445	FHIT	0.750962
FNDC4	0.0583827	FIBP	0.919779
FOLR1	0.168116	FIP1L1	0.788826
FOS	0.220771	FKBP2	0.949655
FOSB	0.194661	FKBP3	0.831834
FOSL2	0.0785951	FLJ10213	0.711996
FOXC1	-0.100908	FLJ10241	0.718561
FRZB	0.289139	FLJ10769	0.832074
FUBP1	0.0441603	FLJ11184	0.796585
FXYD6	0.114843	FLJ12716	0.789662
G0S2	-0.156228	FLJ20035	1.05754
GADD45G	0.115028	FLJ22167	0.809514
GAL3ST4	0.0980533	FRAG1	0.847212
GALNS	0.519892	FRAT2	0.754629
GALNT10	0.0329092	FTH1	0.991105
GALNT14	0.406214	FTSJ3	0.723873
GAPDH	0.164634	FVT1	0.752782
GATA6	-0.298901	FYCO1	0.89278
GATM	0.339132	FZD10	0.764184
GCA	0.423709	G3BP1	0.758804
GCH1	0.403065	G3BP2	0.707563
GEM	0.245824	GAB2	0.747404
GEMIN4	0.450618	GADD45A	0.80492
GGA3	0.1775	GALNT1	0.733241
GGH	0.517295	GALNT11	0.724058
GIMAP4	-0.131767	GALNT3	0.900921
GIMAP5	-0.027328	GALNT7	0.976139
GIMAP6	-0.0201094	GALT	0.71166
GIT1	0.0899706	GARNL4	0.818605
GLG1	0.516683	GARS	0.723006
GLIPR1	0.186596	GAS2L1	0.724612
GLRX	0.173551	GCHFR	0.782747
GMDS	0.299272	GCN1L1	0.776464
GMEB1	0.210255	GDPD5	0.75113
GMFG	-0.122433	GINS1	0.715672
GMIP	0.237512	GINS2	0.730564
GNAQ	0.183955	GLT8D1	0.839971
GNG11	0.093224	GLTP	0.850904
GNG4	0.00532499	GMFB	0.80173
GNPTAB	0.26519	GMPS	0.706447
GOLGB1	0.240404	GNL3	0.750452
GOSR1	0.341109	GOLGA2	0.775137
GOSR2	0.12715	GOLGA4	0.730541
GPNMB	0.130055	GOLGA5	0.775701
GPR1	0.141776	GORASP1	0.87759
GPR116	-0.016924	GOT2	0.986091
GPR137	0.0618379	GPR107	0.733252
GPR137B	0.114101	GPR56	0.758338
GPR161	0.15653	GPRC5B	0.791289
GPR177	0.290976	GPS2	0.779242
GPRC5A	0.300015	GRAMD3	0.875484
GPRC5C	0.00619715	GRHPR	0.886327
GPRIN2	0.180743	GRPEL1	0.773944
GPSM3	0.015986	GSR	0.712172
GPX3	0.027388	GSTK1	0.724368
GPX7	0.266162	GTF2A2	0.946596
GRB2	0.347981	GTF2B	0.791664
GSK3A	0.146449	GTF2E2	0.956793
GSPT1	0.562876	GTF2F1	0.748923
GSS	0.237521	GTF2H1	0.763582
GTDC1	0.188209	GTF3C1	0.79817
GTF2IRD1	-0.10535	H2AFY2	0.808985
GTF3C4	0.307239	H2AFZ	0.794984
GTF3C5	0.171439	HADH	0.862334
GUK1	0.176187	HARS	0.837546
GYPC	-0.11583	HDAC2	0.939983
GZMK	0.091313	HDAC4	0.794006
H1F0	0.226903	HDAC9	0.888921
H2AFX	0.16893	HDGFRP3	0.9283
H3F3A	0.187578	HEBP2	0.746873
H6PD	0.175601	HECA	0.70579
HARS2	0.0348648	HERC1	0.938229
HBA2	0.0118679	HIF1A	0.757679
HBB	0.16218	HIG2	0.782708
HBP1	0.180354	HINT1	0.725751
HDAC11	0.211379	HIP2	0.982528
HES1	0.148821	HMG20A	0.777497
HEXIM1	0.261208	HMG20B	0.705983
HEY1	0.302786	HMG2L1	0.754158
HIST1H1C	0.209664	HMGB2	0.743207
HIST1H1D	-0.00727316	HMMR	0.708193
HIST1H2AE	0.243717	HNRPUL1	0.753636
HIST1H2BE	-0.0476741	HOXC4	0.910205
HIST1H2BF	-0.0433013	HOXC6	0.729319
HIST1H2BH	0.0287041	HPS5	0.841993
HIST1H2BI	0.0841019	HRAS	0.706382
HIST1H2BN	0.0281527	HRH1	0.896593
HIST1H3G	0.0426791	HSBP1	0.86591
HIST1H3H	0.0783978	HSD17B11	0.869991
HIST1H4C	0.171659	HSPA12A	0.944893
HIST1H4I	0.0599535	HSPA4	0.719798
HIST2H2BE	0.13189	HSPA9	0.913254
HLA-A	0.187639	HSPC111	0.881275
HLA-B	0.422298	HSPC159	0.894813
HLA-DMA	-0.172991	HSPC171	0.828697
HLA-DMB	0.0955309	HTATIP2	0.724276
HLA-DQB1	0.0487463	HTRA1	0.890973
HLA-DRA	-0.106484	IARS	0.908993
HLA-F	0.178053	IFIT5	0.717815
HLA-G	0.0942912	IFRD1	0.754134
HMOX1	0.562579	IFT88	0.77292
HN1	0.506686	IGF1R	0.756827
HNMT	0.0283039	IGF2BP2	0.702572
HNRPH1	0.183234	IGF2R	0.893472
HNRPK	0.263751	IL2RB	0.804934
HNRPM	0.24459	ILK	0.752522
HOXB2	0.196343	IMPACT	0.752771
HOXB5	0.0741345	IMPDH2	0.92212
HOXB7	0.395476	IQCB1	0.714928
HOXD1	0.238456	IQCK	0.944091
HRASLS3	0.369625	IQGAP1	0.837868
HSD11B1	-0.0185969	IRF3	0.745908
HSD17B1	0.137675	IRF7	0.799545
HSD17B12	0.222121	IRS2	0.823138
HSD17B14	0.0363471	ISG20	0.723609
HSPA1A	0.111505	ISOC2	0.804264
HSPA1L	0.172102	ITGB8	0.808165
HSPA5	0.384811	JOSD3	0.799169
HSPA8	-0.0544134	JRKL	0.86971
HSPB8	0.220978	KARS	0.930913
HSPD1	0.214919	KATNA1	0.752488
HSPE1	0.427785	KATNB1	0.833426
ICAM1	0.132566	KCTD5	0.763132
ID1	0.399897	KDELR2	0.753106
ID2	0.553011	KIAA0020	0.782645
ID3	0.25307	KIAA0152	0.765609
IER3	-0.0268476	KIAA0157	0.732681
IFI16	-0.130468	KIAA0174	0.922701
IFI30	0.0360756	KIAA0232	0.757993
IFI35	0.133957	KIAA0256	0.780722
IFITM1	0.222897	KIAA0317	0.828629
IFITM2	0.291892	KIAA0430	0.746535
IGFBP4	0.428831	KIAA0753	0.785519
IGFBP7	0.305844	KIAA0831	0.943046
IHH	0.0556104	KIAA0922	0.784298
IKBKE	-0.0244391	KIAA1033	0.72836
IKZF5	0.161541	KIAA1279	0.874265
IL10RB	0.400265	KIF15	0.779566
IL11RA	0.232677	KIF18A	0.732365
IL15	0.550825	KIF1B	0.913745
IL15RA	0.159499	KIF23	0.847214
IL17RC	0.144957	KIF2A	0.849424
IL1B	-0.121301	KLHDC4	0.739744
IL1R1	0.165598	KLHL2	0.923174
IL32	0.0095941	KLHL21	0.712499
IL4R	0.304734	KLHL23	0.902219
IL7R	-0.0222036	KPNA3	0.824223
IL8	0.19608	KRIT1	0.718422
ILF2	0.396441	KRR1	0.786271
INDO	-0.116949	KRT18	0.821012
INSR	0.224773	KRT8	0.83767
INTS3	0.187147	LARP1	0.741623
IQCG	0.0042408	LARP6	0.749893
IQGAP2	0.122663	LARP7	0.887197
IRF8	-0.05843	LARS	0.864984
ISLR	-0.120376	LARS2	0.939794
ITCH	0.248581	LCMT1	0.782789
ITGA5	0.122899	LCMT2	0.852673
ITGA6	0.264198	LCN2	1.08425
ITGA7	0.335555	LDB1	0.866197
ITGB1	0.139962	LEPROTL1	0.928642
ITGB2	0.1654	LGR4	0.911026
ITGB5	-0.0318824	LIMK2	0.83808
ITPR2	0.168617	LOC130074	0.703286
ITSN2	0.149595	LOC57228	1.09236
JAG1	0.331741	LONP1	0.703639
JAM2	0.101653	LPXN	0.81788
JAM3	-0.00105545	LRP8	0.745118
JMJD4	0.197531	LRPAP1	0.766732
JRK	0.123417	LRRC59	0.836178
JTB	0.23971	LTA4H	0.953965
KBTBD4	0.355303	LTBP2	0.717368
KCNH2	0.0876938	LTBP3	0.764048
KCNK15	0.0317244	LYRM2	0.986851
KCNN4	0.201002	LYRM4	0.736642
KCNS1	0.0571565	LZTFL1	0.803319
KCNS3	0.186884	M-RIP	0.817962
KCTD12	0.343287	M6PRBP1	0.780877
KCTD15	0.164067	MAEA	0.95751
KCTD2	0.224737	MAK10	0.918737
KHDRBS1	0.0870885	MAN2A2	0.719718
KIAA0195	0.24497	MAN2B2	0.846175
KIAA0241	0.235845	MANBA	0.742497
KIAA0319L	0.367571	MAP1LC3B	0.774923
KIAA0494	0.49994	MAP3K4	0.724699
KIAA1199	-0.114022	MAP3K7	0.710971
KIAA1539	0.283318	MAP7	0.78412
KIF5C	0.141016	MAPK6	0.882936
KIFC1	0.331344	MAPK9	0.701041
KIRREL	0.164198	MAPKAP1	0.745463
KLF3	0.183768	42434	0.870455
KLF6	-0.153673	MARCKS	0.834333
KLK7	0.156641	MARK3	0.720459
KLK8	0.0449934	MAT2B	0.750308
KRCC1	0.168885	MBD1	0.782917
KRT19	0.258111	ME2	0.771078
KRT23	-0.162192	MED6	0.839026
KRT5	0.0983561	MEN1	0.755424
KRT7	0.199855	METAP1	0.841174
KRT81	0.159761	METAP2	0.855113
LAD1	0.158442	METRN	0.785
LAIR1	0.0019194	METTL9	0.935228
LAMB3	0.253871	MFAP1	0.895752
LAMC1	0.227086	MFSD5	0.773018
LAMC2	-0.0365819	MGAT4B	0.746859
LAP3	0.802213	MGC2752	0.700338
LCP1	-0.023941	MGMT	0.850942
LDLR	0.166697	MINPP1	0.795559
LEFTY2	0.116174	MKNK2	1.01667
LGALS3	0.398436	MLF1IP	0.807875
LGALS3BP	0.30163	MMP7	0.861152
LGALS8	0.206473	MOCS2	0.934101
LHFP	0.0671527	MPHOSPH10	0.717446
LHX6	0.0841879	MPP5	0.803284
LILRB3	-0.0528217	MPPE1	0.808234
LLGL2	0.285616	MRFAP1L1	0.833842
LMNA	-0.11586	MRPL11	0.71373
LMO2	0.151147	MRPL16	0.888168
LOC440348	0.0135501	MRPL18	0.748686
LOC93349	0.0622236	MRPL22	0.744178
LPPR2	0.0898273	MRPL23	0.926425
LRRC42	0.415646	MRPL39	0.837825
LRRC51	-0.0806786	MRPL40	0.910365
LRRC8D	0.163679	MRPL46	0.7552
LSM5	0.330074	MRPL48	0.731218
LTB	0.168534	MRPS11	0.779813
LUM	-0.185043	MRPS31	0.864406
LXN	0.233322	MSH3	0.71573
LY6G6C	0.152169	MTCH2	0.753538
LY86	-0.00358627	MTHFD1	0.763122
LYL1	-0.0238196	MTIF2	0.773214
LYZ	-0.144046	MTL5	0.849109
MADCAM1	0.0430851	MTMR9	0.739541
MAF	0.13799	MTO1	0.91456
MAL	-0.279347	MTX2	0.70611
MAN1C1	0.0833664	MUC16	0.732988
MAP3K10	0.0511562	MUS81	0.787279
MAPBPIP	0.298101	MVP	0.787916
MAPK8IP1	0.119656	MXI1	0.995888
MAPKAPK2	0.113025	MYB	0.962617
MARCKSL1	0.0652356	MYCBP	0.791767
MAT2A	0.160223	MYL6B	0.80038
MATN2	0.0617371	NAGA	0.716754
MBD2	0.172411	NANOS1	0.952733
MBTD1	0.104356	NANS	0.895681
MCAM	0.131913	NAP1L1	0.794061
MCL1	0.118168	NAP1L4	0.88456
MCM7	0.291162	NAPA	0.711598
MDFIC	-0.120586	NARG2	0.742766
MDK	0.264519	NARS	0.810176
MED18	0.185604	NARS2	0.877457
MEF2C	0.184056	NAT1	0.715673
MEGF6	0.0744056	NAT10	0.723629
MET	0.187956	NAV2	0.843705
METTL7A	0.14368	NBPF3	0.708717
MFGE8	0.354202	NCAPD2	0.727809
MFHAS1	0.303086	NCK2	0.737557
MGAT4A	0.18104	NCLN	0.816617
MGC4172	0.260758	NCOR1	0.96405
MGLL	0.0937603	NDEL1	0.700043
MGP	-0.0452632	NDUFA3	0.819464
MICB	0.33084	NDUFA5	0.766437
MIR16	0.534014	NDUFA7	0.837774
MKI67	0.142543	NDUFA8	0.811673
MKNK1	0.258161	NDUFAF1	0.78804
MLX	0.473275	NDUFB6	0.721411
MMD	0.413041	NDUFC1	0.808597
MMP14	0.144704	NDUFS3	0.706713
MMP19	0.00917655	NDUFS4	0.91748
MMP2	0.0490448	NDUFV2	0.733749
MMP24	0.102007	NEK4	0.71118
MMP3	0.0670629	NFIB	0.723816
MMP9	-0.124252	NFIC	0.782546
MNAT1	0.532219	NFYB	0.795521
MORN1	0.011835	NGLY1	0.796577
MOSC2	-0.0121835	NGRN	0.988633
MPP2	0.158279	NINJ1	0.789401
MREG	0.424968	NIP30	0.887388
MRM1	0.0117683	NIPSNAP1	0.730012
MRPL24	0.282861	NISCH	0.806036
MRPL52	0.233421	NKIRAS2	0.835091
MRPS14	0.374364	NME3	0.835289
MRPS7	0.421517	NME7	0.738514
MSRA	0.430775	NMU	0.82571
MST1	0.370106	NOC3L	0.98802
MSX1	0.240688	NOL11	0.71838
MT1X	0.0210283	NOL8	1.10281
MTMR11	0.168994	NOLA1	0.758741
MTX1	0.344789	NOSIP	0.919065
MUC1	-0.180007	NPTN	0.818865
MVK	0.123298	NR3C1	0.769522
MXRA8	-0.114044	NSMCE4A	0.830022
MYH11	0.0686332	NSUN5	0.823515
MYL4	0.0416849	NT5C2	0.772152
MYLK	0.234956	NTHL1	0.909006
MYLPF	0.153195	NUBP1	0.786711
MYO1C	0.43071	NUCB1	0.731133
MYO1F	-0.0144229	NUDT15	0.764092
MYOHD1	0.155644	NUP107	0.738665
MYST3	0.378484	NUP43	0.892554
NAT9	0.295903	NUP54	0.881417
NBL1	0.256151	NUP98	0.896054
NBR1	0.17415	OAT	0.899644
NCDN	0.185005	OAZ1	0.734371
NCK1	0.400062	OAZ2	0.809206
NCOR2	0.108498	OBFC1	0.814315
NDN	0.117157	OGDH	0.795411
NDRG2	0.146033	OGDHL	0.728638
NDST1	0.0588583	OGFOD1	0.77633
NDUFB3	0.237866	OIP5	0.735004
NEDD9	0.1616	ORC3L	0.720748
NEK1	0.387822	OS9	0.73882
NEK11	0.0502515	OSBPL10	0.836062
NEK9	0.208671	OXA1L	0.729121
NES	0.362671	OXSM	0.804105
NEUROD6	0.00683803	OXSR1	0.900516
NF1	0.136116	P15RS	0.74209
NFAT5	0.233086	P4HA1	0.95724
NFE2L1	0.393114	PAFAH1B1	0.722245
NFE2L3	0.375214	PAFAH1B3	0.86879
NFKBIE	0.316423	PALB2	0.796785
NFRKB	0.262553	PAMCI	0.72779
NFS1	0.253721	PAPOLA	0.802399
NID2	0.272053	PAPSS1	0.872967
NINJ2	0.0356132	PAQR3	0.766753
NIPBL	0.307243	PARN	0.923483
NMD3	0.212224	PARP16	0.727749
NMI	0.258767	PARP6	0.834162
NNMT	0.0772486	PARP8	0.885518
NOS1AP	0.134516	PAXIP1	0.783931
NOTCH1	0.410615	PBK	0.926434
NOTCH3	0.182216	PBLD	0.842908
NOV	0.15316	PBX3	0.702166
NOX5	-0.0399488	PCBP2	0.932201
NP	-0.0658346	PCCA	0.785915
NPDC1	0.21901	PCID2	0.775292
NPEPL1	0.109976	PCM1	0.767472
NPEPPS	0.234771	PCNT	0.99659
NPFFR1	-0.0402128	PDCD6IP	0.855317
NPHP4	0.262574	PDGFC	0.910222
NPR1	0.124877	PDGFRL	0.842831
NPTX2	0.207885	PDHB	0.725464
NQO1	0.00502048	PDHX	0.73461
NR1D1	0.116903	PDIA6	0.994743
NR2F1	0.175899	PELI2	0.901436
NR4A1	0.0833621	PELO	0.768844
NR4A2	0.00834118	PELP1	0.76515
NRCAM	0.167247	PEO1	0.759679
NRIP1	0.422183	PET112L	0.889526
NRSN2	0.285754	PEX3	0.897432
NSF	0.447123	PFAS	0.960039
NT5C	0.217087	PFDN5	0.76843
NTAN1	0.0071339	PGM3	0.848826
NUAK2	0.334952	PGRMC2	0.871291
NUP188	0.256691	PHF10	0.869401
NUP214	0.291667	PHF2	0.910907
NUS1	0.491442	PHLPP	0.706867
OAS1	0.129521	PIAS1	0.819024
OAS2	0.0603845	PIGB	0.718165
OAS3	0.233031	PIGG	0.986479
OASL	-0.0836805	PIK3C3	0.707832
OGFR	0.149285	PIP5K1C	0.772064
OLFML2B	-0.235759	PIP5K3	0.963553
OSGEP	0.117052	PISD	0.915223
OVGP1	0.143107	PITPNA	0.715273
P2RY5	-0.142257	PITPNB	0.700743
P2RY6	0.0829066	PKM2	0.806634
PABPC3	-0.0667561	PLA2G12A	0.923887
PABPN1	0.195689	PLCD1	0.715212
PADI1	0.0327138	PLEKHA1	0.991891
PADI2	0.172034	PLEKHC1	0.713655
PAFAH1B2	0.225173	PLEKHF2	0.754666
PAFAH2	0.21415	PLOD1	0.924062
PALLD	0.365389	PLSCR3	0.837675
PALM	0.394737	PMPCA	0.883047
PALMD	0.262311	PMPCB	0.745465
PAPSS2	0.216521	PMS1	0.806941
PARVA	0.432806	PNKP	0.783
PCCB	0.40812	PNMA1	0.794575
PCDH12	-0.0244211	PODXL	0.797371
PCDH17	0.131811	POGK	0.84447
PCDHB12	0.0135296	POLD3	0.721071
PCDHGA10	0.203751	POLR1D	0.815463
PCF11	0.0803042	POLR2B	0.789016
PCK1	0.0377537	POLR2E	0.994173
PCK2	0.225595	POLR2F	0.875426
PCP4	0.370845	POLR3E	0.981733
PCTK3	0.0627984	POLR3K	0.753987
PCTP	0.410406	POP5	0.874562
PDAP1	0.160262	PPAT	0.800652
PDE4C	0.0151417	PPCDC	0.740957
PDE4DIP	0.191544	PPIB	0.927036
PDE9A	0.160637	PPIF	0.961435
PDGFD	0.101985	PPIG	0.82951
PDGFRA	0.2284	PPP1R12A	0.718869
PDK1	0.017328	PPP1R9A	0.866749
PDLIM4	0.413847	PPP2R2A	0.970737
PDZRN3	-0.0486735	PPP2R2D	0.880753
PEA15	0.259612	PPP2R4	0.80707
PECI	0.170798	PPP2R5C	0.727011
PELI1	0.447746	PPP2R5E	0.917082
PER3	0.208349	PPP3CB	0.844153
PFTK1	0.405877	PPP4C	0.911864
PHACTR4	0.294287	PPP4R1	0.838729
PHGDH	-0.118831	PPP4R2	0.964601
PHLDA2	0.381946	PPP6C	0.840661
PHLDA3	0.234787	PPWD1	0.960051
PHLDB1	0.17782	PRC1	0.738128
PHOX2A	-0.0144123	PRDM4	0.84507
PI3	0.210374	PRDX3	0.707959
PIGO	0.333432	PRKAB1	0.730771
PIK3C2B	0.223623	PRKAG1	0.734592
PIK3CD	0.194683	PRKCD	0.812761
PILRB	0.0396523	PRMT1	0.875997
PINK1	0.290378	PRPF19	0.739616
PKNOX1	0.265742	PRPF31	0.873846
PLAGL2	0.306943	PRPF8	0.717925
PLAT	-0.00704831	PRR13	0.764438
PLAUR	0.145969	PRRG4	0.806575
PLCB1	0.271662	PRSS8	0.783229
PLCB2	0.0537656	PSCD2	0.768914
PLCB4	0.435752	PSIP1	0.777302
PLCG2	0.703317	PSMA3	0.80067
PLCL2	0.0975634	PSMA4	0.780047
PLEKHA9	0.235329	PSMB6	0.892124
PLEKHB2	0.297503	PSMB7	0.700957
PLEKHG3	0.153141	PSMD12	0.746951
PLEKHM1	0.100655	PSMD13	0.798154
PLEKHO1	0.151736	PSMD5	0.982696
PLEKHQ1	0.297066	PTCD2	0.735008
PLK1	0.161009	PTCD3	0.805552
PLK2	0.612196	PTEN	1.09897
PLK3	0.0676413	PTGS1	0.888798
PLOD3	0.316592	PTPLAD1	0.851459
PLSCR1	0.26765	PTPN3	1.10545
PLSCR4	0.237964	PTPN4	0.751741
PLTP	0.355602	PTPRK	0.815929
PLVAP	-0.00709004	PTPRM	0.72497
PMAIP1	0.418501	PTS	0.826986
PMF1	0.356785	PUS3	0.703523
PMP22	-0.1328	PWP1	0.820857
PMS2	0.134482	QPRT	0.809742
PMS2L3	0.184405	RAB11A	0.853082
PNOC	0.260415	RAB14	0.722073
PNPLA2	0.194861	RAB38	0.769969
POLE2	0.377812	RAB6IP1	0.757462
POLH	0.252722	RAC1	0.709706
POLR1B	0.0247225	RAD17	0.806007
POLR2A	0.0861374	RAD50	0.78289
POLR3C	0.181942	RALBP1	0.812294
POMT2	0.162839	RANBP5	0.779026
PON2	0.186512	RAPGEF6	0.762059
POU2F1	0.359737	RARRES2	0.941024
PPARD	0.181092	RARS	0.777527
PPIA	0.297617	RASA1	0.916195
PPIC	0.458309	RASSF7	0.781128
PPP1CB	0.189776	RBM13	0.817644
PPP1R10	0.146553	RBM22	0.800933
PPP1R16B	0.13674	RBM26	0.816877
PPP1R3C	0.170747	RBM35B	0.746173
PPP2R5A	0.181582	RBM7	0.753393
PRB3	0.0927431	RBX1	0.736237
PRB4	0.0495277	RCBTB2	0.900318
PRCC	0.399147	RCN1	0.723957
PRDM10	0.0991129	RCN2	0.807731
PRDX1	0.321062	RCOR1	0.84039
PRDX6	0.278238	RDH11	0.839382
PRKACA	0.163323	RDH14	0.787022
PRKACB	0.158339	REEP5	0.891678
PRKAR1B	0.0851849	RELA	0.72601
PRKAR2B	0.374102	REV3L	0.943564
PRKCH	0.189712	REXO2	0.901635
PROCR	0.0556086	RFC1	0.921639
PROS1	-0.195969	RFC4	0.773438
PRPF39	0.320203	RGPD5	0.841082
PRSS22	0.104669	RHOB	0.973155
PRSS3	0.00473292	RHOT1	0.96427
PSAT1	0.0492525	RIC8A	0.829211
PSCD1	0.143894	RIF1	0.705054
PSMA6	0.517292	RIOK2	0.911041
PSMB8	0.306177	RNF111	0.996664
PSMB9	-0.0167928	RNF126	0.789777
PSMC2	0.268977	RNF14	0.728522
PSMC3	0.393978	RNF34	0.929592
PSMD1	0.330401	RNF4	0.796664
PSMD14	0.272602	RNF40	0.862161
PSMD7	0.429923	RNF41	0.721468
PTCRA	0.00524518	RNH1	0.732568
PTGES	0.0389227	RNMTL1	0.700336
PTGIS	0.102359	RNPS1	0.702698
PTMS	0.191456	RPA1	0.860653
PTN	0.112831	RPA2	0.874775
PTPN6	0.265638	RPA3	0.800231
PTPRCAP	0.0151016	RPP14	0.884597
PTPRF	0.320582	RPP30	0.747807
PXMP4	0.0434418	RPUSD2	0.708705
PYCR1	0.249159	RRAGA	0.703765
R3HDM1	0.205905	RRM1	0.801245
RAB13	0.23086	RTF1	0.742215
RAB17	0.26892	RUVBL2	0.80569
RAB31	0.074661	RWDD1	0.798365
RAB35	0.189654	SACS	0.755078
RAB3A	0.173601	SAE1	0.978096
RAB3IL1	0.0851725	SAMM50	0.902931
RAB6B	0.102107	SART3	0.954738
RABGGTA	0.17642	SAV1	0.711285
RABIF	0.243965	SCAMP1	0.830833
RABL5	0.214127	SCAMP4	0.861377
RAD54B	0.101844	SCAP	0.836867
RAG1AP1	0.170687	SCYE1	0.929727
RALA	0.289825	SDC1	0.932839
RALGDS	0.484197	SDF2	0.84255
RAMP1	0.0733879	SDF2L1	0.939279
RAPGEF5	0.321619	SDHD	0.957019
RARA	0.155047	SEC11A	0.755254
RARRES1	0.53198	SEC23IP	0.765557
RARRES3	0.0421368	SEC24B	0.862769
RASAL1	0.243589	SEH1L	0.932538
RASIP1	0.19417	SENP3	0.709998
RASSF2	0.2012	SEPHS2	0.827233
RBBP5	0.284506	42623	0.74513
RBM12	0.16409	SEPW1	0.865123
RBM12B	0.096456	SEPX1	0.701497
RBM14	0.0253066	SERINC1	0.821028
RBM15	0.0722304	SERPINE2	0.806129
RBM23	0.338313	SETD2	0.813394
RBM8A	0.196687	SETD6	0.842131
RBM9	0.212078	SF3A2	0.905523
RBPMS	0.304069	SFRS2B	0.829843
RCE1	0.16809	SFRS9	0.796826
RDH5	0.107442	SGPL1	0.972967
REEP2	0.0916964	SH3YL1	0.967354
REL	0.197808	SHMT2	0.713026
RELB	0.180383	SHOC2	0.801877
REM1	0.00342595	SIAH1	0.701221
RERE	0.261855	SIL1	0.725926
REXO4	0.434966	SIRT1	0.704133
RGL1	0.103022	SKIV2L2	0.881834
RGS16	0.0574713	SLBP	0.831311
RGS19	0.184055	SLC22A5	0.74654
RGS2	0.00741688	SLC25A11	0.93481
RGS5	-0.0843433	SLC25A13	0.736043
RHBDF2	0.0965547	SLC25A20	0.806044
RHOBTB3	0.304322	SLC25A38	0.980967
RHOD	0.378719	SLC25A4	0.858871
RHOF	0.204704	SLC25A46	0.786474
RICS	0.323103	SLC26A2	0.787322
RIMS2	0.0120678	SLC30A9	0.896395
RIPK5	0.13657	SLC31A1	0.712373
RIT1	0.294186	SLC34A2	0.87368
RNASE1	0.0663829	SLC35A1	0.807578
RNASE6	0.172237	SLC35F2	0.955469
RNASEL	0.00838078	SLC39A4	0.701354
RNASET2	0.387837	SLC7A5	0.788516
RNF24	0.222281	SLCO3A1	0.895023
RNF6	0.174519	SLTM	0.765756
ROBO3	0.192354	SMAD1	0.86305
ROR1	0.225401	SMAD2	0.733266
RPL10A	0.118632	SMAD4	0.97429
RPL10L	0.0242888	SMARCC1	0.836397
RPL12	0.037194	SMARCE1	0.721706
RPL18A	0.186284	SMC6	0.712163
RPL21	0.269967	SMEK1	1.00325
RPL23	0.235425	SMUG1	0.894192
RPL24	0.194542	SNAP23	0.738738
RPL27	0.0941965	SNAP29	0.839672
RPL37	0.157995	SNAPC1	0.90051
RPL38	0.188608	SNRK	0.815127
RPS11	0.147954	SNRPA1	0.782402
RPS19	0.259128	SNRPD3	0.713018
RPS20	0.18906	SNUPN	0.976172
RPS27	0.0673514	SNX2	0.725075
RPS27A	0.267488	SOCS5	0.786795
RRAS	0.198655	SOD2	0.829317
RRP12	0.164889	SORD	0.995639
RSAD2	0.276994	SORL1	0.788596
RTDR1	0.131287	SP3	0.701017
RTN2	0.0802509	SPAG7	0.753736
RTP4	0.00123824	SPATA5L1	0.876025
RUFY3	0.313023	SPATS2	0.965388
S100A1	0.00802839	SPTAN1	0.948692
S100A10	0.146273	SQSTM1	0.73694
S100A11	0.130767	SRI	0.711639
S100A2	-0.0546288	SRM	0.705043
S100A4	-0.0134938	SRRM2	0.728184
S100A8	-0.524803	SS18L1	0.711074
S100PBP	0.344737	SS18L2	0.738323
SAFB	0.170427	SSB	0.792663
SAMD9	-0.0428662	SSSCA1	0.871633
SAP30BP	0.432427	ST5	0.880492
SATB1	-0.0317057	STAM	0.814185
SCAMP3	0.306598	STAMBP	0.733705
SCAMP5	0.122198	STIL	0.726359
SCARA3	0.384703	STOML2	0.742944
SCARB1	0.187067	STX12	0.809018
SCD	0.197762	STX4	0.889209
SCG5	-0.241268	STX8	0.772953
SCIN	0.0446478	SUCLA2	0.711466
SCNN1A	0.105791	SUCLG2	0.807615
SDC4	0.213619	SUMO1	0.701887
SDCBP	0.258825	SUPT4H1	0.765641
SDCCAG8	0.187478	SUPV3L1	0.725313
SDHB	0.177535	SUV420H1	0.784903
SEC14L1	0.301085	SUZ12	0.844653
SEC22B	-0.023712	SV2C	0.723562
SECISBP2	0.380284	SWAP70	0.71923
SECTM1	-0.00713961	SYNCRIP	0.802275
SELPLG	0.0159846	SYNE2	0.880166
SEMA4A	-0.102062	TAF11	0.745383
SEMA5A	0.00272118	TAF5	0.958835
SERINC3	0.287078	TAF9	0.826211
SERPINA5	0.0868918	TBC1D9	0.733908
SERPINB1	0.113151	TBCA	0.714198
SERPINB6	0.0957932	TBPL1	0.860235
SERPINB9	0.220006	TCERG1	0.714685
SETX	0.411419	TCF12	0.784067
SFPQ	0.00444727	TCF25	0.72718
SFRS1	0.183668	TCF4	0.733381
SFRS2	0.147843	TCP1	0.768545
SFT2D2	0.180623	TDRD3	0.732514
SFXN3	0.329976	TEAD1	0.74525
SGK2	-0.025636	TEGT	0.833941
SH2B3	0.141467	TERF2	0.878958
SH2D4A	0.297107	TFAM	0.74394
SHC1	0.151718	TFPT	0.865672
SIGLEC1	0.00924259	TGDS	0.820896
SIRPA	0.0592559	THAP11	0.857275
SIT1	0.0543329	THG1L	0.810414
SKIP	0.287429	THOC1	0.821626
SLA	0.0600007	THOC6	0.700301
SLAMF7	-0.200408	THOC7	0.817591
SLC12A8	0.0992946	TIA1	0.76571
SLC15A3	0.452763	TICAM1	0.7638
SLC16A1	0.134547	TIMELESS	0.803134
SLC16A3	0.117915	TIMM44	0.735657
SLC16A5	0.0538033	TIMM9	0.845654
SLC1A3	0.367662	TIPIN	0.928577
SLC22A18	0.424778	TJP1	0.773134
SLC25A17	0.111264	TJP3	0.837614
SLC29A1	0.330401	TM2D3	0.824491
SLC2A10	0.486449	TM9SF2	0.74695
SLC30A3	0.263298	TMED3	0.846708
SLC36A1	0.111361	TMEM106C	0.928965
SLC39A1	0.141502	TMEM111	0.719595
SLC39A8	0.298249	TMEM118	0.953696
SLC44A4	0.212832	TMEM135	0.796436
SLC7A7	-0.0629287	TMEM16K	0.793314
SLC7A8	0.0976257	TMEM33	0.97066
SLC9A1	0.300447	TMEM48	0.904026
SLCO2A1	0.095127	TMEM5	0.741648
SLCO4A1	0.0592503	TMEM50A	0.733986
SLIT3	0.290422	TMEM50B	0.844598
SLPI	0.0752199	TMEM66	0.726364
SMAD6	0.184797	TMEM93	0.782
SMAD7	0.266694	TMPO	0.852017
SMARCD3	0.393479	TNFAIP8	0.886639
SMC5	0.637754	TNKS2	0.719689
SMG5	0.199226	TOB1	0.859951
SMOX	0.0760139	TOPBP1	0.726906
SMPD2	0.13611	TOPORS	0.710172
SMURF1	0.0420492	TOR1B	0.712456
SNCA	0.551893	TP53BP1	0.786955
SNCAIP	-0.00438019	TP53I3	0.913115
SNCG	0.239606	TPD52L1	0.84231
SNF1LK	0.0929208	TPM1	0.892788
SNN	0.289239	TRAP1	0.965573
SNPH	0.0341327	TREX1	0.917567
SNTA1	0.148591	TRIAP1	0.824635
SNX11	0.408335	TRIB2	0.764212
SOX10	0.0472748	TRIM2	0.862177
SP100	0.306072	TRIM28	0.942267
SP110	0.325184	TRIM32	0.923641
SPAG4	0.0593073	TRIM5	0.750044
SPARC	-0.0359823	TRIM52	0.782681
SPARCL1	0.135202	TRIM8	0.873075
SPDEF	0.244838	TRIP6	0.942808
SPHK2	0.257067	TRMT11	0.738353
SPIN1	0.668067	TRSPAP1	0.8145
SPN	-0.00394417	TSEN34	0.868147
SPOCK2	0.273165	TSG101	0.956882
SPRY4	0.222664	TSPYL1	0.79606
SPSB1	0.208477	TSPYL4	0.788471
SREBF1	0.412452	TSSC1	0.770824
SRF	0.17751	TST	0.80873
SRP9	0.253569	TTC1	0.747102
SRPRB	0.190911	TTC17	0.844214
SSR2	0.294973	TTC3	0.812262
ST3GAL5	0.11891	TTC35	0.708859
ST6GAL1	0.149761	TTK	1.04015
ST6GALNAC2	0.178275	TTLL12	0.864008
ST6GALNAC5	0.584936	TTLL4	0.734204
ST7L	0.157952	TULP4	0.732019
STAB1	0.199854	TXN	0.921913
STAG3	0.226064	TXNL1	0.839654
STARD13	0.263125	TXNRD1	0.797668
STEAP3	0.150854	TYMS	0.978042
STK11	0.269143	U2AF1	0.858392
STK17A	0.207339	UBE2D2	0.745541
STK39	0.224482	UBE2D3	0.923873
STMN1	0.401457	UBE2M	0.875788
STOM	0.344442	UBE2N	0.762305
STRA6	0.21047	UBE2S	0.926578
STT3A	0.481339	UBE3A	0.927505
STXBP6	0.813041	UBE3C	0.734929
SULF1	0.411686	UBL3	0.715392
SUMO4	-0.014667	UBN1	0.717761
SUSD4	0.336347	UBP1	0.747589
SYDE1	0.046196	UBXD8	0.73084
SYNJ2	0.197341	UEVLD	0.752146
SYNPO	0.418232	UFD1L	0.938937
TACC1	0.0713129	UFM1	0.842632
TACSTD2	0.202429	UGDH	1.03498
TAGLN	0.372185	UNC84A	0.723973
TAGLN2	0.10805	UNG	0.849339
TAOK3	0.324037	UQCR	0.848306
TAP1	0.317772	UQCRC2	0.706395
TAPBP	0.123059	UROS	0.749805
TBC1D8	0.274213	USP14	0.903018
TBKBP1	0.0340771	USP21	0.706092
TCP11L1	0.14007	USP3	0.765118
TDP1	0.496383	USP47	0.882064
TFAP2A	0.0948393	USP52	0.868448
TFAP4	0.116746	UTP20	0.760756
TFEB	0.0137489	UVRAG	0.826081
TFPI2	-0.177585	VDAC1	0.751387
TGFB1I1	0.205863	VIL2	0.992889
TGFB3	0.262301	VPS13C	0.902025
TGFBI	0.033364	VPS26A	0.808776
TGM1	0.278211	VPS33B	0.775953
TGM2	-0.0263846	VPS37B	0.729631
TGOLN2	0.387011	VPS4A	0.879064
THBS1	0.192643	VPS4B	0.863214
THBS2	-0.0562615	VRK1	0.748464
THBS4	0.0195343	VTI1B	1.01244
THY1	0.311852	WARS	0.765736
TIMM17A	0.311848	WARS2	0.719812
TIMP2	0.152835	WASF1	0.896353
TIMP3	0.38642	WASF3	0.927655
TINAGL1	0.115843	WBSCR22	0.767874
TJP2	0.950731	WDR1	0.763332
TLE2	0.217208	WDR12	0.710085
TMC6	0.212541	WDR18	0.711331
TMEFF1	0.123678	WDR32	0.707319
TMEM132A	0.305608	WDR41	0.724794
TMEM140	0.0836548	WDR73	0.92861
TMEM158	0.640249	WDR74	0.778143
TMEM176A	-0.0655619	WEE1	0.7551
TMEM2	0.397325	WFS1	0.719102
TMEM30B	0.413192	WHSC1	0.708603
TMEM45A	0.166232	WHSC2	0.760566
TMEM63A	0.168616	WIPI2	0.701676
TMEPAI	0.169075	WRB	0.789242
TMPRSS6	-0.0177653	WRN	0.765391
TNFRSF21	0.224194	WSB2	0.758426
TNNI3	0.0500079	XAB1	0.760499
TNNT1	0.0697268	XBP1	0.788391
TNXB	0.0110308	XPA	0.771489
TOE1	0.415688	XPO6	0.72288
TOLLIP	0.327327	XPO7	0.814691
TP53	0.195869	XPOT	0.727695
TP53I11	0.252327	XTP3TPA	0.849801
TPM2	0.0462807	YEATS4	0.76992
TPST1	0.104461	YES1	0.905252
TPT1	0.145937	YIF1A	0.88247
TREM2	-0.220845	YKT6	0.759949
TRIM25	0.075878	YPEL1	0.711214
TRIM29	0.256585	YWHAH	0.721866
TRIOBP	0.422209	ZBED5	0.898858
TRMT5	0.238443	ZBTB24	0.848066
TRPM4	0.252909	ZBTB43	0.80011
TSC1	0.399127	ZCCHC10	0.890977
TSC22D2	0.122433	ZCCHC8	0.798044
TSPAN15	0.257959	ZDHHC4	0.82045
TSPAN5	0.0796623	ZDHHC6	0.936787
TSPAN9	0.141581	ZFAND5	0.969624
TSPYL5	0.144403	ZFYVE16	0.733859
TSR1	0.300117	ZMYM2	0.926469
TTF1	0.489711	ZNF12	0.807094
TTF2	0.243963	ZNF232	0.979127
TUBD1	0.289833	ZNF24	0.710739
TUBGCP2	0.139607	ZNF259	0.710399
TYROBP	0.0281535	ZNF26	0.935264
UBB	-0.226678	ZNF271	0.868479
UBC	0.144864	ZNF277P	0.718136
UBD	0.161284	ZNF304	0.792361
UBTF	0.131702	ZNF32	0.799493
UNC93B1	0.250535	ZNF432	0.768699
USP13	0.230916	ZNF468	0.782776
USP6	0.208889	ZNF580	0.754861
VAMP3	0.480384	ZNF606	0.746715
VAMP4	0.332623	ZNF787	0.718094
VAMP5	-0.0991262	ZNF83	0.758836
VAMP8	0.181202	ZNF84	0.966627
VANGL1	0.241948	ZNF91	1.0039
VAT1	0.200507	ZNHIT3	0.74059
VDR	-0.0181431
VEGFA	0.18858
VEGFC	-0.0278267
VILL	0.375085
VPS13A	0.381984
VWF	-0.0122539
WBP2	0.290292
WDR23	0.38376
WDR5B	0.414365
WDR62	0.139108
WFDC2	0.298418
WIPF1	-0.083951
WISP3	0.388095
WNT16	0.0504148
WNT5A	0.088901
WT1	0.328183
WWP2	0.11248
XKR8	0.139695
XPO4	0.21538
YARS	0.384815
YBX2	0.246438
YIPF1	0.368562
YIPF4	0.323891
YTHDC1	0.21336
ZAK	0.057672
ZBTB40	0.186313
ZC3H12A	0.0665825
ZDHHC18	0.263382
ZFP36L2	0.255364
ZFR	0.122081
ZFYVE9	0.138275
ZHX3	0.0641409
ZMAT3	0.177614
ZNF124	0.386171
ZNF174	0.184984
ZNF200	0.322632
ZNF274	0.370099
ZNF335	0.0932785
ZNF33B	0.536916
ZNF423	0.71435
ZNF467	0.158988
ZNF552	0.295247
ZNF639	0.171597
ZNF767	0.293873
ZNRF4	0.0231237
